# Estimating residence times of lymphocytes in ovine lymph nodes

Margaret M. McDaniel<sup>1</sup> and Vitaly V. Ganusov<sup>2,3\*</sup>

<sup>1</sup>Department of Immunology, University of Texas Southwestern, Dallas, TX 75390, USA

<sup>2</sup>Department of Mathematics, University of Tennessee, Knoxville, TN 37996, USA

<sup>3</sup>Department of Microbiology, University of Tennessee, Knoxville, TN 37996, USA

\*vitaly.ganusov@gmail.com

January 6, 2019

## Abstract

The ability of lymphocytes to recirculate between blood and secondary lymphoid tissues such as lymph nodes (LNs) and spleen is well established. Sheep have been used as an experimental system to study lymphocyte recirculation for decades and multiple studies exist documenting accumulation and loss of intravenously (i.v.) transferred lymphocytes in efferent lymph of various ovine LNs. Yet, surprisingly little work has been done to accurately quantify the dynamics of lymphocyte exit from the LNs and to estimate the average residence times of lymphocytes in ovine LNs. In this work we developed a series of mathematical models based on fundamental principles of lymphocyte recirculation in the body and specifically, on how lymphocytes enter and exit lymph nodes in non-inflammatory (resting) conditions. We fitted these models to data from several independent experiments. Our analysis suggested that in sheep, recirculating lymphocytes spend on average 3 hours in the spleen and 20 hours in skin or gut-draining LNs with a distribution of residence times in LNs following a skewed gamma (lognormal-like) distribution. The latter result is in contrast with recent suggestions that the distribution of residence times of naive T cells in murine LNs is exponential and that lymphocyte residence times depend on the LN type (e.g., gut- vs. skin-draining). Our mathematical models also suggested an explanation for a puzzling observation of the long-term persistence of i.v. transferred lymphocytes in the efferent lymph of the prescapular LN (pLN); the model predicted that this is a natural consequence of long-term persistence of the transferred lymphocytes in circulation. We also found that lymphocytes isolated from the skin-draining pLN have a two-fold increased entry rate into the pLN as opposed to the mesenteric (gut-draining) LN (mLN). Likewise, lymphocytes from mLN had a three-fold increased entry rate into the mLN as opposed to entry rate into pLN. Importantly, these cannulation data could not be explained by preferential retention of cells in LNs of origin. Taken together, our work illustrates the power of mathematical modeling in describing the kinetics of lymphocyte migration in sheep and provides quantitative estimates of lymphocyte residence times in ovine LNs.

**Keywords:** mathematical model; lymphocyte migration; lymph nodes; residence time; sheep

## 32 1 Introduction

33 One of the peculiar properties of the adaptive immune system of mammals is the ability of its  
34 cells, lymphocytes, to recirculate between multiple tissues in the body; that is lymphocytes in the  
35 blood are able to enter the tissues and after some residence times in the tissues, they return to  
36 circulation [1]. The pattern of lymphocyte recirculation in general depends on the lymphocyte  
37 type (e.g., B or T cell), status of the lymphocyte (resting vs. activated), and perhaps tissues via  
38 which lymphocytes are migrating. Naive, antigen-unexperienced lymphocytes, primarily recirculate  
39 between secondary lymphoid tissues such as lymph nodes, spleen, and Peyer’s patches [2–4]. Following  
40 activation after exposure to an antigen, naive lymphocytes become activated and differentiate into  
41 effector lymphocytes which are able to access non-lymphoid tissues such as the skin and gut epithelium  
42 [2, 3, 5–7].

43 Why lymphocytes recirculate is not entirely clear [8, 9]. Because the frequency of lymphocytes  
44 specific to any given antigen is in general low (e.g., [10]) and the place of entry of any pathogen is  
45 unknown by the naive host, recirculation of lymphocytes may increase the chance to encounter the  
46 infection by rare pathogen-specific lymphocytes [11]. However, evidence that impairing lymphocyte  
47 recirculation influences ability of the host to respond to infections is very limited. For example, the  
48 use of the drug FTY720 (fingolimod) in humans has been associated with a higher incidence of severe  
49 infections [12, 13]. FTY720 is believed to reduce the ability of lymphocytes to exit lymph nodes,  
50 thus, reducing their ability to recirculate [14–16]. However, whether the side-effects of fingolimod is  
51 exclusively due to its impact on recirculation ability of lymphocytes in humans is unknown.

52 The ability of lymphocytes to recalculate between blood and lymph have been nicely demonstrated  
53 in now classical experiments by Gowans in rats and later by Hall and Morris in sheep [17, 18].  
54 Interestingly, subpopulations of lymphocytes can migrate preferentially to different regions of the  
55 body, based on their origin as well as their type [19–24]. Molecular interactions between receptors  
56 and associated ligands corresponding to the selective entry of lymphocytes to both lymphoid and  
57 non-lymphoid tissue have been relatively well-characterized [25–28]. However, the actual kinetics  
58 of lymphocyte recirculation have been characterized mostly qualitatively, and we still do not fully  
59 understand how long lymphocytes reside in the spleen, LNs, and Peyer’s patches, and how such  
60 residence times depend on lymphocyte type and animal species, especially for humans.

61 Understanding lymphocyte migration via lymph nodes (LNs) may be of particular importance  
62 for larger animals, including humans, where LNs constitute the majority of the secondary lymphoid  
63 tissues [29, 30]. Lymphocytes may enter the LNs via two routes: from the blood via high endothelial  
64 venules (HEVs) or from the afferent lymph draining interstitial fluids from surrounding tissues [1].  
65 Experimental measurements suggest that under resting, noninflammatory conditions most lympho-  
66 cytes (about 80–90%) enter the LNs via HEVs [31]. Lymphocytes in LNs exit the nodes with efferent  
67 lymphatics which either passes to the next LN in the chain of LNs or via right or left lymphatic ducts  
68 return to circulation [1, 9, 32]. In contrast, cells can only enter the spleen from the blood and cells  
69 exiting the spleen directly return to circulation.

70 In the past, to study lymphocyte recirculation via individual LNs sheep or cattle have been used  
71 [18, 33–38]. In such experiments, lymphocytes are collected from specific tissue of the animal, e.g.,  
72 blood, a removed LN, or efferent lymph of a LN, labeled with a radioactive or fluorescent label, and  
73 then re-infused back into the same animal (e.g., intravenously, i.v.). The dynamics of the labeled  
74 cells could then be monitored in the blood, or more commonly, in the efferent lymph of different

75 LNs over time [35, e.g., see Figure 1A]. This is done by inserting a cannula and collecting lymph and  
76 cells exiting the LN over time. The dynamics of the labeled cells in the efferent lymph of various  
77 LNs follow a nearly universal pattern — the number of labeled cells increases initially, reaches a  
78 peak and then slowly declines over time [20, 31, 39, 40, and see Figure 2C&D]. Given that in many  
79 such experiments, the peak of labeled cells in the efferent lymph is reached in 24 hours and declines  
80 slowly, from the asymmetry of this time course (e.g., Figure 2C) it can be interpreted that the average  
81 residence time of lymphocytes in the ovine lymph nodes is about 48 hours. To our knowledge, the  
82 actual residence time in ovine LNs has not been regularly reported. Interestingly, with the use of  
83 mathematical modeling an accurate quantification of how long lymphocytes spend in LNs in sheep  
84 has been recently performed [41].

85 In their pioneering study Thomas *et al.* [41] analyzed data on migration of lymphocytes via  
86 individual ovine LNs. To quantify these dynamics, the authors developed a mathematical model  
87 which considers cell migration via a LN as a random walk between multiple sub-compartments in the  
88 LN. In the model cells entering the LN start in the first sub-compartment, progress via the series of  
89 subcompartments by a random walk and eventually exit the node by leaving the last subcompartment  
90 [41]. As their model allows for the possibility for cells to spend variable lengths of time in the LN, it  
91 can naturally explain the long duration of labeled lymphocytes exiting the LN. By fitting the model  
92 to several different sets of data, the authors concluded that the average residence time of lymphocytes  
93 in ovine LNs is about 31 hour [41].

94 In addition to the average residence time the distribution of residence times may be important.  
95 In particular, if lymphocytes that just entered the LN have the same chance of exiting it as lym-  
96 phocytes that already spent some time in it (i.e., distribution of residence times is exponential), this  
97 could suggest that exit of lymphocytes from LN is a simple Poisson-like stochastic process. Indeed,  
98 one recent study suggested that residency time of naive CD4 and CD8 T cells in LNs of mice is  
99 exponentially distributed [42]. In contrast, if lymphocytes require some time to be spent in the LN,  
100 for example, to acquire the ability to exit the node, then the distribution of residence time cannot be  
101 exponential. Recent work from our group suggests that residence time of thoracic duct lymphocytes  
102 in LNs of rats cannot be exponential and is best described by a gamma distribution with the shape  
103 parameter  $k = 2$  or  $3$  [43]. Our analysis of data on kinetics of lymphocyte exit from inguinal LNs of  
104 photoconvertable Kaede mice did not allow to firmly establish the shape of the residence time dis-  
105 tribution [9]. Whether the distribution of residence time of lymphocytes in ovine LNs is exponential  
106 or more complex is unknown.

107 In this paper, we formulated a series of mathematical models aimed at describing the kinetics of  
108 recirculation of lymphocytes in sheep. All models take into account basic physiological constrains  
109 on lymphocyte migration, for example, that lymphocytes enter the LNs continuously from the blood  
110 and lymphocytes that exit LNs return back to circulation. The models were fitted to a series of  
111 experimental data from previously published studies on lymphocyte migration in sheep. Our results  
112 suggest that the distribution of residence times of lymphocytes in ovine LNs is best described by a  
113 non-exponential distribution with estimated average residence times being 12-22 hours which depends  
114 on the type of lymphocytes used in experiments. The long-term presence of labeled lymphocytes  
115 in efferent lymph of cannulated LNs was explained by a continuous entry of new cells from the  
116 blood to the LN, thus, simplifying a previous modeling result [41]. Overall, our analysis provides  
117 a quantitative framework to estimate kinetics of lymphocyte recirculation using measurements of  
118 lymphocyte numbers in the blood and efferent lymph of ovine LNs. Such a framework may be useful  
119 to understand the efficacy and potential limitations of immunotherapies involving adoptive transfer

120 of T cells in humans [44–46].

## 121 2 Materials and methods

### 122 2.1 Experimental data

123 For our analyses we digitized the data from several publications [20, 39, 47]. We describe in short  
124 design of these experiments and how the data have been collected. For more detail the reader is  
125 referred to the original publications.

126 **Lymphocyte dynamics in blood and efferent lymph (dataset #1).** Experiments of Frost  
127 *et al.* [39] have been performed with 4-24 month old Alpenschaf or Schwarzkopf sheep (Figure 1A).  
128 Lymphocytes were collected from the efferent lymph of different lymph nodes (e.g., prescapular) at  
129 room temperature in sterile bottles with heparin and penicillin-streptomycin then labeled with  $^{51}\text{Cr}$   
130 for 30 minutes after being washed and resuspended in phosphate buffered saline. For i.v. infusions  
131 and for taking blood samples, a surgical procedure to install an indwelling cannula into the jugular  
132 vein was performed. The efferent duct of specific lymph nodes was also cannulated to allow for  
133 collection of lymph that passed through the node. The number of labeled lymphocytes in efferent  
134 lymph was determined by washing cells in a phosphate buffered saline and counting with a gamma  
135 scintillation counter. Labeled lymphocytes in venous or peripheral blood were counted similarly by a  
136 gamma scintillation counter then compared to the activity of plasma from the same volume of blood.

137  $^{51}\text{Cr}$  labeled lymphocytes were injected i.v. and the efferent lymph of prescapular LN (pLN) was  
138 collected. Lymph was collected as described above at 20-minute intervals for 3 hours or daily for  
139 about two weeks. The number of labeled lymphocytes in the lymph node was expressed as cpm  
140 per  $10^7$  cells collected. Peripheral blood samples were only collected for certain experiments and  
141 they were taken at 10 minutes, 30 minutes, 1 hour, and 3-hour intervals thereafter. The number  
142 of labeled lymphocytes in peripheral blood was expressed as cpm/ml of whole blood minus the  
143 activity in the plasma. Cells exiting the lymph node were measured for 120 hours, while cells in the  
144 blood were measured for 90 hours, then once more at the 120<sup>th</sup> hour. For this reason, we discuss  
145 lymphocyte migration kinetics in terms of short- and long-term migration experiments. The short-  
146 term experiments include the dynamics of the labeled lymphocytes in both blood and efferent lymph  
147 for the first 90 hours, and the long-term dataset considers all available data (measurement up to 120  
148 hours).

149 According to Blood Volume of Farm Animals, Hampshire sheep less than a year to 3 years old  
150 have on average 6.3-5.8 ml blood per 100 gram weight and an average weight of 92-156 lbs [48].  
151 This results in about 2.63 L of blood for Hampshire sheep less than a year old and about 4.1 L for  
152 Hampshire sheep 2-3 years old. The breed of sheep used in this study weight from 60 kg (Alpenschaf)  
153 to 100 kg (Schwarzkopf) at maturity, so it is reasonable to assume that these total blood estimates  
154 are less than those calculated for Hampshire sheep. We assume the volume of blood in the sheep  
155 is an average of these given volumes, specifically  $V = 3.4$  L. This estimate was used to convert the  
156 estimate of the number of labeled lymphocytes per ml of blood to the total number of lymphocytes  
157 in the whole blood.

158 In one set of experiments (Figure 1 in Frost *et al.* [39])  $2.5 \times 10^9$  labeled cells (representing

159  $12.6 \times 10^6$  cpm) were injected i.v. into sheep corresponding on average  $RL_o = 200$  cells/cpm. Because  
160 in the original data, the cells in the blood at time  $t$  ( $RL_t$ ) were measured in cpm/ml of blood, the  
161 total number of cells in the blood  $B$  was calculated using the formula

$$B = RL_o \times V \times RL_t \quad (1)$$

162 with  $V = 3.4$  L and  $RL_t$  was digitized from Figure 1 of Frost *et al.* [39]. In the same experiments  
163 labeled cells exiting the pLN were measured as cpm/ $10^7$  cell with each data point summing 3 hours  
164 of cells collected every 20 minutes. Therefore, the amount of labeled cells exiting the pLN per hour  
165 ( $C_t$ ) is one third of this number. The total output of the pLN is given in Figure 3 in Frost *et al.* [39]  
166 and was estimated to be  $f = 10.85 \times 10^7$  cell/hr. We calculate total cells exiting the pLN per hour  
167 by:

$$m_{LB}L = RL_o \times f \times C_t \quad (2)$$

168 where  $RL_o = 200$  cells/cpm. The final data (`dataset1.csv`, given as Supplement to the paper)  
169 includes changes in the total number of labeled lymphocytes in the peripheral blood and the number  
170 of labeled lymphocytes exiting pLN per hour over time.

171 **Migration of lymphocytes from afferent to efferent lymph (dataset #2).** To further  
172 investigate how lymphocytes migrate via ovine LNs we digitized data shown in Figure 4 of Young  
173 *et al.* [47]. In these experiments different subsets of lymphocytes (CD4 T cells, CD8 T cells,  $\gamma\delta$  T  
174 cells, and B cells) were collected from efferent prescapular lymph and labeled with PKH-26 or CFSE  
175 to distinguish between different cell subsets. A maximum of  $2 \times 10^6$  cells of each type were infused into  
176 two popliteal afferent lymphatics over one hour. Cells were collected as they exited the cannulated  
177 efferent lymph of the popliteal LN (poLN), and phenotyped. The final data (`dataset2.csv`, given  
178 as Supplement to the paper) includes the percent of labeled cells found in the efferent lymph of the  
179 poLN over time.

180 **Migration of T lymphocytes via skin-draining and gut-draining lymph nodes (dataset  
181 #3).** The final set of experimental data we used come from recirculation experiments of Reynolds  
182 *et al.* [20] with young sheep (Figure 6). Lymphocytes were isolated by cannulating the skin-draining  
183 pLN or the ileal end of the gut-draining mesenteric lymph node chain (mLN). Collected lymphocytes  
184 were passed through nylon wool columns to reduce the proportion of cells with surface immunoglob-  
185 ulin to less than 5% of the total, thus, creating T cell-enriched sample. Cells from intestinal or  
186 prescapular lymph were labeled with FITC or RITC, respectively. Labeled cells were re-infused into  
187 the same animal i.v. and cell density (given in labeled cells per  $10^4$  cells) was reported for 240 hours  
188 (Figure 1 in Reynolds *et al.* [20]). Because the authors did not report the overall cell output in  
189 efferent lymph of pLN and mLN, we used the provided numbers of the frequency of labeled cells in  
190 in the lymph for fitting the models. Existing data suggest similar output of lymphocytes from pLN  
191 ( $1 - 5 \times 10^8$  cells/h) or mLN ( $1 - 10 \times 10^8$  cells/h, [35]) which in part justifies our approach. The  
192 final data (`dataset3.csv`, given as Supplement to the paper) includes the number of labeled cells  
193 from skin or intestinal lymph per  $10^4$  cells found in efferent lymph of pLN or mLN over time during  
194 cannulation.

195 The raw data from the cited papers were extracted using digitizing software Engauge Digitizer



196 (digitizer.sourceforge.net).

## 197 2.2 Mathematical Models

### 198 2.2.1 Basic assumptions

199 In our models we assume that blood is the main supplier of lymphocytes to other tissues and that  
200 when exiting these tissues, lymphocytes will return to the blood [43, 49]. We also assume that all  
201 LNs behave similarly with respect to exit rates of lymphocytes from the node, and that cell infusion  
202 does not impact lymphocyte migration via individual LNs. The assumption that residency times of  
203 lymphocytes are similar in different LNs has been found in some but not all previous studies [42, 43].

### 204 2.2.2 Models to predict lymphocyte dynamics in efferent lymph of LNs

205 **Recirculation model.** To predict the dynamics of i.v. transferred labeled lymphocytes in the  
206 blood and efferent lymph of pLN we extended a previously proposed compartmental model describing  
207 recirculation kinetics of lymphocytes in the whole body [43]. The model (Figure 1B) predicts the  
208 number of i.v. transferred lymphocytes in the blood ( $B$ ), spleen ( $S$ ), lymph nodes ( $L$ ), and other  
209 non-lymphoid tissues ( $T$ ). In the model we ignored migration of lymphocytes via vasculature of  
210 the lung and liver since previous work suggested that resting lymphocytes pass via these tissues, at  
211 least in rats, within a minute [43]. This is different from migration of activated lymphocytes via  
212 these tissues which could take hours [9]. In the model, cells in the blood can migrate to the spleen,  
213 lymph nodes, or other tissues at rates  $m_{Bi}$  and cells can return to circulation from these tissues at  
214 rates  $m_{iB}$  where  $i = S, L, T$ . When exiting spleen or non-lymphoid tissues lymphocyte follow the  
215 first order kinetics, so the decline of cells in the tissues in the absence of any input is given by an  
216 exponential function. This in part is based on our previous work suggesting of migration of thoracic  
217 duct lymphocytes via spleen can be described as first order kinetics [43]. In contrast, migration of  
218 lymphocytes via LNs may not follow the first order kinetics (e.g., [43]) and thus was modelled by  
219 assuming  $k$  sub-compartments in the nodes with equal transit rates  $m_{LB}$ . Such sub-compartments  
220 may represent different areas in the LNs, for example, paracortex and medulla. Mathematically, we  
221 used the sub-compartments to model non-exponential residency time of lymphocytes in the LNs.

222 To describe accumulation and loss of labeled lymphocytes in the cannulated lymph nodes we  
223 assume that a fraction of lymphocytes  $\lambda$  migrating to lymph nodes migrate to the cannulated node  
224  $Lo_1$  (e.g., pLN, Figure 1B) while  $1 - \lambda$  cells migrate to other LNs ( $L_1$ ). We assume that cells do  
225 not die but the process of migration to non-lymphoid tissues with no return back to circulation is  
226 equivalent to cell death. We did consider several alternative models in which death rate was added  
227 to the model (see Discussion). Taken together, with these assumptions the mathematical model for  
228 the kinetics of lymphocyte recirculation in ovine LNs is given by equations:

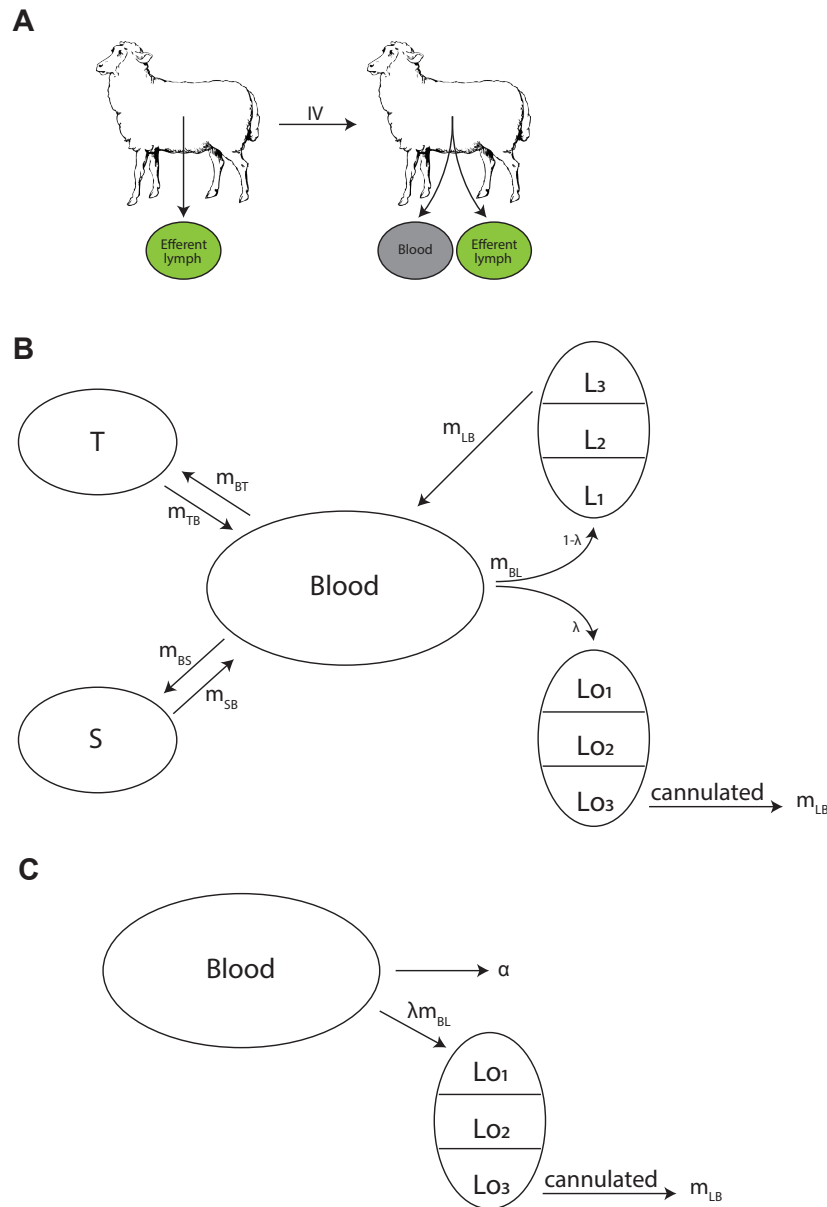

**Figure 1:** Experimental design and schematics of mathematical models on lymphocyte migration in sheep. In experiments, recirculating lymphocytes were obtained from efferent lymph of various LNs, labeled in vitro, and then re-injected i.v. into the same animal. The concentration of injected lymphocytes was then followed in sheep in the blood and the efferent lymph of a given LN (panel A). To describe migration kinetics of recirculating lymphocytes via LNs we adopt a basic mathematical model from our previous study [43]. In the “recirculation” model (panel B) lymphocytes in the blood  $B$  may migrate to three ( $n = 3$ ) major tissue compartments: spleen  $S$  (at a rate  $m_{BS}$ ), lymph nodes  $L$  (at a rate  $m_{BL}$ ), or other peripheral tissues  $T$  (at a rate  $m_{BT}$ ). A fraction  $\lambda$  of cells migrating to lymph nodes migrate to the cannulated LN ( $L_0$ ) and thus can be measured, and remaining cells migrate to other lymph nodes ( $L$ ). Exit of lymphocytes from the spleen or peripheral tissues follows first order kinetics at rates  $m_{SB}$  and  $m_{TB}$ , respectively (and thus residency times in these tissues are exponentially distributed). In contrast, following our previous work [43] residency times in LNs are gamma distributed modeled by assuming  $k$  sub-compartments (in the figure  $k = 3$ ); exit from each sub-compartment is given by the rate  $m_{LB}$ . In the alternative, “blood-LN dynamics” model (panel C) cells in the blood ( $B$ ) enter the cannulated LN at a rate  $\lambda m_{BL}$  and exit the LN by passing via  $k$  sub-compartments at a rate  $m_{LB}$ . Cells in the blood also leave the blood at a rate  $\alpha$  (in case of a single exponential decline).

$$\frac{dB}{dt} = m_{SB}S + m_{LB}L_k + m_{TB}T - (m_{BS} + m_{BL} + m_{BT})B, \quad (3)$$

$$\frac{dS}{dt} = m_{BS}B - m_{SB}S, \quad (4)$$

$$\frac{dL_1}{dt} = (1 - \lambda)m_{BL}B - m_{LB}L_1, \quad (5)$$

$$\frac{dL_i}{dt} = m_{LB}(L_{i-1} - L_i), \quad i = 2, 3, \dots, k, \quad (6)$$

$$\frac{dLo_1}{dt} = \lambda m_{BL}B - m_{LB}Lo_1, \quad (7)$$

$$\frac{dLo_i}{dt} = m_{LB}(Lo_{i-1} - Lo_i), \quad i = 2, 3, \dots, k, \quad (8)$$

$$\frac{dT}{dt} = m_{BT}B - m_{TB}T, \quad (9)$$

229 where cells exiting the cannulated lymph node,  $m_{LB}Lo_k$  do not return to the blood because they are  
 230 sampled, and  $m_{LB}Lo_k$  is the rate of labeled lymphocyte exit from the sampled lymph node (which  
 231 is compared to experimental data, e.g., column 2 in the dataset #1, and see Figure 2C&D).

232 Because in our experimental data, measurements of labeled lymphocytes were done either in the  
 233 blood and efferent lymph (or only efferent lymph), the assumption of  $n = 3$  tissue compartments  
 234 (spleen, LNs, and other non-lymphoid tissues) may not be always justified. Furthermore, the number  
 235 of sub-compartments  $k$  in LNs is also unknown. Therefore, in our analyses we fitted a series of models  
 236 assuming different values for  $k$  and  $n$  to the data from Frost *et al.* [39] (dataset #1) and compared  
 237 the quality of the model fit to data using AIC (see Results section).

238 The average residence time of lymphocytes in the spleen or non-lymphoid tissues is  $1/m_{SB}$  and  
 239  $1/m_{TB}$ , respectively. The residence time of lymphocytes in the LNs is given as  $RT = k/m_{LB}$ . The  
 240 initial number of labeled cells in the blood varied by experiment and is indicated in individual graphs.  
 241 In some fits parameter  $\lambda$  could not be identified from the data and thus was fixed (indicated by absent  
 242 predicted confidence intervals). The rest of the parameters were fit by the model.

243 **Blood-LN dynamics model.** Many studies of lymphocyte recirculation that report kinetics of  
 244 accumulation and loss of labeled lymphocytes in efferent lymph of ovine LNs do not report dynamics  
 245 of these cells in the blood which is the major limitation of such studies. Therefore, to gain insight  
 246 into whether LN cannulation data alone can be used to infer lymphocyte residence times in the LNs  
 247 we propose an alternative model which only considers lymphocyte dynamics in the blood, one LN,  
 248 and the efferent lymph of the cannulated LN. In this “blood-LN dynamics” model (Figure 1C) the  
 249 dynamics of lymphocytes in the blood is given by a phenomenological function  $B$  given as a sum  
 250 of  $j$  declining exponentials. The rationale to use such a model stems from the kinetics of labeled  
 251 lymphocyte dynamics in the blood observed in Frost *et al.* [39] and studies (Figure 2A&B and [41])  
 252 even though actual dynamics in other experimental systems may not follow the same pattern. The  
 253 dynamics of labeled cells in the sampled lymph node is thus driven by the continuous entry of labeled  
 254 cells from the blood into the LN. The model is then given by following equations



$$B = \sum_{i=1}^j X_i e^{-\alpha_i t}, \quad (10)$$

$$\frac{dLo_1}{dt} = \lambda m_{BL} B - m_{LB} Lo_1, \quad (11)$$

$$\frac{dLo_i}{dt} = m_{LB} (Lo_{i-1} - Lo_i), \quad i = 2, \dots, k, \quad (12)$$

255  $X_i$  and  $\alpha_i$  are the initial values and the rate of decline in the  $i^{th}$  exponential function,  $\lambda m_{BL}$  is  
 256 the overall rate at which lymphocytes from the blood enter the LN, and  $m_{LB}$  is the rate at which  
 257 lymphocytes move between  $k$  sub-compartments in the LN and exit the LN. The rate at which  
 258 lymphocytes exit the LN and thus are sampled in the LN efferent lymph is  $m_{LB} Lo_k$ . It should be  
 259 noted that parameters  $\lambda$ ,  $m_{BL}$  and  $X_i$  in many cases are not identified from the data on lymphocyte  
 260 dynamics in the efferent lymph, thus, the main parameter that we are interested in is the average  
 261 residence time of lymphocytes in the LNs given by  $RT = k/m_{LB}$ . Because the dynamics of cells in  
 262 the blood is generally unknown when fitting the model predictions to data, we varied the number of  
 263 exponential functions  $j = 1, 2, 3$  and compared the quality of fits of different models using AIC.

### 264 2.2.3 Migration when cells are injected into afferent lymph

265 In one set of experiments migration of labeled lymphocytes via LNs was measured by directly injecting  
 266 lymphocytes into the afferent lymph of a LN and observing accumulation and loss of these cells in  
 267 the efferent lymph of the LN. To use these data to estimate the lymphocyte residence time in the  
 268 LN we assume that cells injected into afferent lymph  $A$  migrate into the lymph node at a rate  $m_A$ ,  
 269 and then the cells migrate via each of  $k$  sub-compartments in the LN at a rate  $m_{LB}$ . With these  
 270 assumptions the dynamics of cells in the afferent lymph and the LN are given by equations:

$$\frac{dA}{dt} = -m_A A, \quad (13)$$

$$\frac{dLo_1}{dt} = m_A A - m_{LB} Lo_1, \quad (14)$$

$$\frac{dLo_i}{dt} = m_{LB} (Lo_{i-1} - Lo_i), \quad i = 2, 3, \dots, k, \quad (15)$$

271 where initially all labeled cells were in the afferent lymph. As previously stated, the rate of lym-  
 272 phocyte exit from the LN via efferent lymph is given by  $m_{LB} Lo_k$ . The average residence time of  
 273 lymphocytes in the LN is then  $RT = k/m_{LB}$ .

### 274 2.2.4 Homing to different lymph nodes

275 In the final set of experiments Reynolds *et al.* [20] collected lymphocytes from efferent lymph of pLN  
 276 or mLN, labeled and then re-infused the collected cells i.v. into the same animal. The labeled cells

277 were then collected in the efferent lymph of the pLN and mLN. Because the authors did not report  
 278 the dynamics of labeled cells in the blood, we extended the “blood-LN dynamics” model (see eqns.  
 279 (10)–(12)) to describe cell migration from the blood to the efferent lymph of two LNs. The number  
 280 of labeled lymphocytes found in the  $i^{\text{th}}$  sub-compartment of the pLN and mLN are given by  $Lo_{1,i}$   
 281 and  $Lo_{2,i}$ , respectively.

$$B = \sum_{i=1}^j X_i e^{-\alpha_i t}, \quad (16)$$

$$\frac{dLo_{1,1}}{dt} = \lambda m_{BL1} B - m_{L1B} Lo_{1,1}, \quad (17)$$

$$\frac{dLo_{1,i}}{dt} = m_{L1B} (Lo_{1,i-1} - Lo_{1,i}), \quad i = 2, \dots, k, \quad (18)$$

$$\frac{dLo_{2,1}}{dt} = \lambda m_{BL2} B - m_{L2B} Lo_{2,1}, \quad (19)$$

$$\frac{dLo_{2,i}}{dt} = m_{L2B} (Lo_{2,i-1} - Lo_{2,i}), \quad i = 2, \dots, k, \quad (20)$$

282 where  $m_{L1B}$  and  $m_{L2B}$  are the rate of lymphocyte exit from the pLN and mLN, respectively,  $m_{BL1}$   
 283 and  $m_{BL2}$  are the rates of lymphocyte entry from the blood to pLN and mLN, respectively, and  
 284  $j = 1, 2$  in fitting models to data. Because the data clearly showed the difference in accumulation of  
 285 lymphocytes in different LNs, we considered two alternative explanation for this difference. In one  
 286 model we assume that the difference in kinetics is due to differences in the rate of lymphocyte entry  
 287 into specific LNs ( $m_{BL1} \neq m_{BL2}$ ) while residence times are identical in the two LNs ( $m_{L1B} = m_{L2B}$ ).  
 288 In the alternative model, the rate of entry into the LNs are the same but residence times may differ  
 289 ( $m_{BL1} = m_{BL2}$  and  $m_{L1B} \neq m_{L2B}$ ).

## 290 2.2.5 Statistics

291 The models were fitted to data in R (version 3.1.0) using `modFit` routine in `FME` package by log-  
 292 transforming the data (single or two different measurements) and model predictions and by minimiz-  
 293 ing the sum of squared residuals. Numerical solutions to the system of equations were obtained using  
 294 ODE solver `lsoda` (from the `deSolve` package) with default absolute and relative error tolerance.  
 295 Different algorithms such as `BFGS`, `L-BFGS-B`, or `Marquart` in the `modFit` routine were used to find  
 296 parameter estimates. Discrimination between alternative models was done using corrected Akaike  
 297 Information Criterion, AIC [50]

$$AIC = N \log \left( \frac{SSR}{N} \right) + 2p + \frac{2p(p+1)}{N-p-1}, \quad (21)$$

298 where  $SSR$  is the sum of squared residuals,  $N$  is the number of data points, and  $p$  is the number of  
 299 model parameters fitted to data. The model with the minimal AIC score among all tested models  
 300 was viewed as the best fit model, but a difference of AIC score of 1 – 3 between best fit and second  
 301 best fit models was generally viewed as not significant [50]. Predicted 95% confidence intervals for

302 estimated parameters were calculated as  $\pm 2\sigma$  with standard deviation  $\sigma$  provided for each parameter  
303 by the `modFit` routine.

## 304 **3 Results**

### 305 **3.1 Estimating lymphocyte residency time in the LNs using lympho-** 306 **cytes dynamics in efferent lymph**

307 To study recirculation of different subsets of lymphocytes in sheep, typical experiments involve iso-  
308 lation of lymphocytes from a tissue (e.g., blood, LN, efferent lymph of a LN), labeling of the isolated  
309 lymphocytes, re-infusion of the labeled cells into the same animal, and monitoring of the concentra-  
310 tion of labeled cells in different tissues, typically the efferent lymph of LNs [35, Figure 1A]. In one  
311 such experiment, Frost *et al.* [39] collected lymphocytes from the efferent lymph of a pLN, labeled  
312 the cells with  $^{51}\text{Cr}$  and re-injected the cells into the sheep i.v. The authors measured concentration  
313 of labeled cells in the blood or the percent of labeled cells that were exiting a pLN [39]. We scaled  
314 these data and calculated the total number of labeled cells in the blood (Figure 2A) or the number  
315 of labeled cells exiting the pLN per unit of time (Figure 2C, see Materials and Methods for more  
316 detail). To describe the dynamics of the labeled cells in the blood and lymph simultaneously, we  
317 developed two alternative mathematical models: recirculation model and blood-LN dynamics model  
318 (Figure 1B&C and see Materials and Methods for more detail). The recirculation model assumes  
319 that migration of lymphocytes occurs between major secondary lymphoid tissues, while the blood-LN  
320 dynamics model uses phenomenologically described dynamics of labeled cells in the blood to predict  
321 the dynamics of labeled cells in the efferent lymph of the LN. Both models were first fitted to the  
322 experimental data on labeled lymphocyte dynamics in the blood and efferent lymph in the first 90  
323 hours after cell transfer (“short-term migration” data).

324 While the overall structure of the recirculation model was defined by the number  $n$  of different  
325 compartments through which lymphocytes could recirculate (Figure 1B), we investigated how many  
326 such compartments are in fact needed to describe the experimental data. Therefore, we fitted a  
327 series of recirculation models with a variable number of compartments and determined how well  
328 such models described the data. In addition, we also tested how many sub-compartments  $k$  in the  
329 LNs are needed for best description of the data (see eqns. (3)–(9)). The analysis revealed that  
330  $n = 3$  tissue compartments and  $k = 3$  sub-compartments in the LNs are needed to adequately  
331 describe the dynamics of labeled cells in the blood and efferent lymph (Table 1). Such a model  
332 could accurately describe simultaneously the loss of labeled cells in the blood and accumulation and  
333 loss of labeled cells in the efferent lymph (Figure 2A&C). The model predicted existence of two  
334 recirculation compartments with the average residence times of 2.4 and 19.5 hours, with the latter  
335 compartment corresponding to LNs in the sheep. The nature of the first compartment is unclear but  
336 given the estimated residence time it is likely that the first compartment represent spleen (e.g., see  
337 [43]). The final third compartment was needed to explain the long-term loss of labeled cells from  
338 the blood at a rate of about  $d = 0.02/\text{h}$ . The predicted rate of lymphocyte migration to tissues  
339 ( $m_{BS} + m_{BL} + m_{BT} \approx 1.4 - 1.6/\text{h} \gg d$ , see Table 2) is higher than the observed rate  $d$  because of the  
340 return of lymphocytes that had migrated to lymphoid tissues back to circulation. The model also  
341 naturally explains the long-term decline in the number of labeled lymphocytes found in the efferent  
342 lymph of the cannulated pLN which is simply driven by the decline of labeled cells in the blood. The

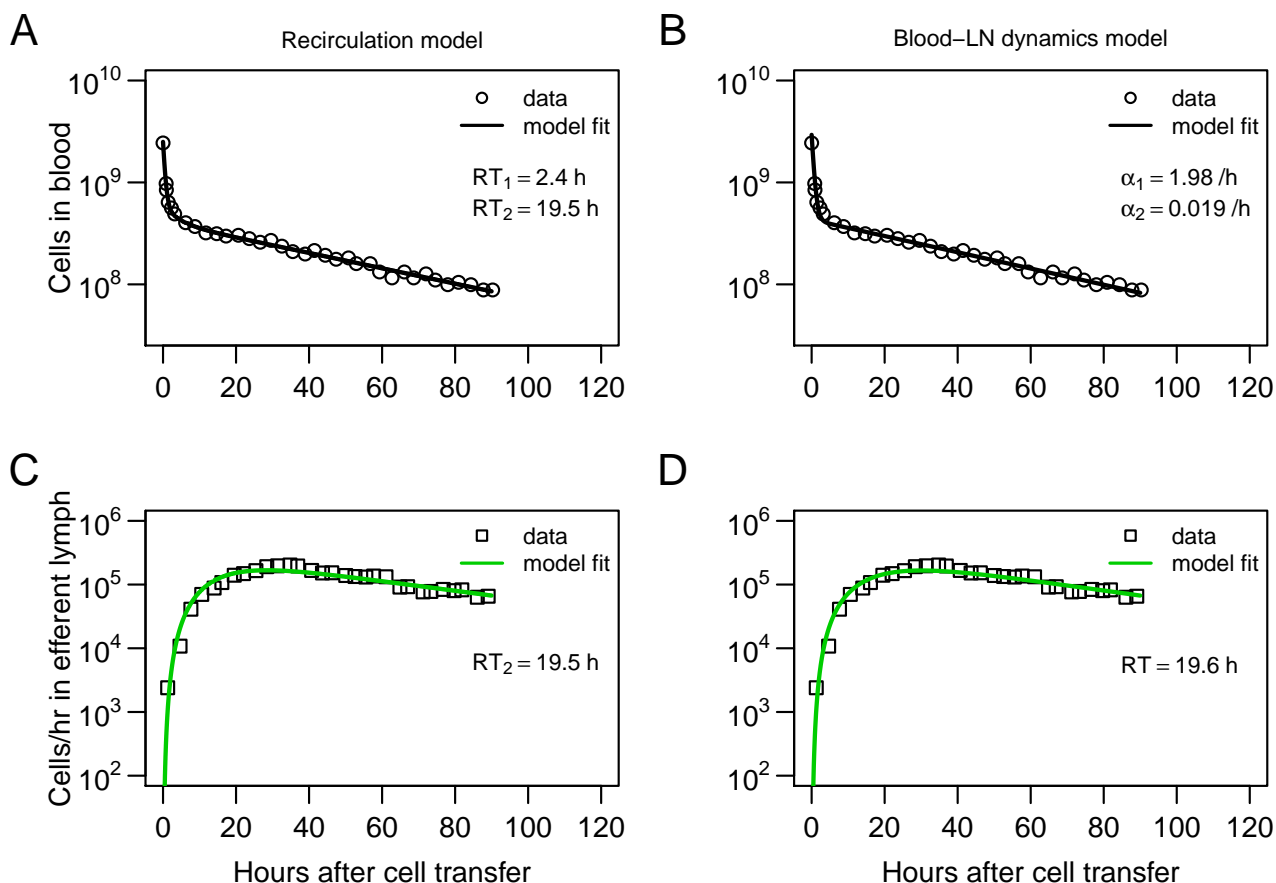

**Figure 2:** Dynamics of recirculating lymphocytes (RLs) in the blood naturally explains kinetics of accumulation and loss of RLs in prescapular LNs (pLN) of sheep. RLs were collected by cannulating pLN in sheep and then reinfused into the animal (see Frost *et al.* [39], Materials and Methods and Figure 1 for more detail). Dynamics of RLs in the blood (panels A&B) and in the efferent lymph of the pLN (panels C&D) for the first 90 hours after cell transfer (short-term migration) are shown by markers. We fitted two alternative models to these data. The first model assumed that the lymphocytes in the blood are able to recirculate between several tissue compartments such as spleen, LNs, and other tissues (see Figure 1B and eqns. (3)–(9)); the model with  $n = 3$  tissue compartments (spleen, LNs, and other non-lymphoid tissues) and  $k = 3$  sub-compartments in the LNs was able to accurately explain the data (panels A&C). The average residence time estimated for the two first compartments ( $RT_1$  and  $RT_2$ ) are indicated in the panels. The second, blood-LN dynamics model considers that the loss of RLs from the blood is described by phenomenologically by  $j = 2$  exponential functions (with rates  $\alpha_1$  and  $\alpha_2$ ) and that LNs have  $k = 3$  sub-compartments (see Figure 1C and eqns. (10)–(12)). The estimated average residence time of lymphocytes in the pLN is indicated in panel D as  $RT$ . Fits of models that assume different numbers of tissue compartments, different number of sub-compartments in LNs, or different numbers of exponential functions are shown in Tables 1 and S1. Parameters for the best fits of these models are given in Table 2.

343 analysis also suggests that none of the obvious characteristics of the distribution of the lymphocyte  
 344 exit rate from the LN such as the time of the peak or the average of the overall distribution (e.g.,  
 345 see Figure 2C) accurately represent the average residence time. This result strongly suggests that  
 346 to accurately estimate lymphocyte residence times from LN cannulation experiments it is critical to  
 347 use appropriate mathematical models.

348 Assuming a smaller ( $k = 1$ ) or a larger ( $k = 4$ ) number of sub-compartments in the LNs resulted

349 in poorer fits of the data (Table 1). The intuitive reason of why the model in which lymphocyte  
 350 residence times in LNs are exponentially distributed ( $k = 1$ ) does not fit the data well follows from  
 351 the rapid loss of labeled lymphocytes in the blood within the first hours after lymphocyte transfer  
 352 (Figure 2A). Rapid decline in the number of labeled lymphocytes in the blood reduces the rate at  
 353 which new labeled cells enter the pLN which would have resulted in a relatively rapid exit of cells  
 354 from the pLN for exponentially distributed residence time. Similarly, the model in which there are  
 355 too many sub-compartments would force the distribution of cells in the efferent lymph to be even  
 356 broader, thus, also resulting in poorer fit. Thus, this analysis suggests that migration of lymphocytes  
 357 via LNs is not described by a simple exponential function and there is a requirement for lymphocytes  
 358 to spend some minimal time in LNs before exiting into circulation.

| Short term migration data (< 90 hours)      |   |     |                                    |         |                |         |
|---------------------------------------------|---|-----|------------------------------------|---------|----------------|---------|
|                                             |   |     | Number of tissue compartments, $n$ |         |                |         |
|                                             |   |     | 1                                  | 2       | 3              | 4       |
| Number of<br>sub-compartments<br>in LN, $k$ | 1 | SSR | 6.834                              | 3.613   | 3.109          | 3.135   |
|                                             |   | AIC | -177.58                            | -229.26 | -195.25        | -170.69 |
|                                             | 2 | SSR | 8.251                              | 1.405   | 0.836          | 0.810   |
|                                             |   | AIC | -212.19                            | -238.23 | -282.84        | -258.89 |
|                                             | 3 | SSR | 8.599                              | 0.681   | 0.315          | 0.981   |
|                                             |   | AIC | -206.15                            | -252.17 | <b>-333.03</b> | -307.16 |
|                                             | 4 | SSR | 8.298                              | 0.985   | 0.981          | 0.937   |
|                                             |   | AIC | -187.37                            | -264.68 | -259.10        | -257.01 |

**Table 1:** Comparison of different recirculation mathematical models fitted to the data on RL dynamics in blood and precapular LN. Experiments were performed as described in Figures 1 and 2 and a series of mathematical models assuming recirculation of lymphocytes via  $n$  different tissue compartments with LNs having  $k$  sub-compartments (eqns. (3)–(9)) were fitted to experimental data (shown in Figure 2A&C). We tested  $n = 1 \dots 4$  different tissue compartments with  $k = 1 \dots 4$  sub-compartments in LNs. The bold AIC value shows the model of best fit with  $n = 3$  and  $k = 3$ . Parameters for the best fit model are shown in Table 2 and the best fit is shown in Figure 2A&C.

359 It is interesting to note how the dynamics of labeled lymphocytes in the blood may be used to infer  
 360 recirculation kinetics of cells. Indeed, the initial rapid decline of the number of labeled lymphocytes  
 361 is explained in the model by migration to secondary lymphoid tissues and change in the decline rate  
 362 at 2-3 hours after lymphocyte transfer is naturally explained by the exit of initially migrated cells  
 363 from one of the compartments (most likely spleen) back to the blood. Thus, lymphocyte kinetics in  
 364 the blood suggests residence time in first compartment of about 2-3 hours (Table 2).

365 The recirculation LN model makes a strong assumption that the dynamics of labeled lymphocytes  
 366 in the blood and efferent lymph are due to migration of lymphocytes into and out of different  
 367 tissues (Figure 1B). Without measurement of lymphocyte accumulation and loss in other secondary  
 368 lymphoid tissues such as spleen, predictions of the recirculation model remain speculative. Therefore,  
 369 to estimate residence times of lymphocytes in LNs we developed an alternative mathematical model  
 370 which links the lymphocyte dynamics in efferent lymph to cell dynamics in the blood. This model  
 371 involves a small number of assumptions, the major of which is the physiological constraint that most  
 372 lymphocytes enter lymph nodes from from blood [2]. Intuitively, however, this model allows us to  
 373 estimate the time taken by cells to migrate from the blood to the efferent lymph of a LN irrespective  
 374 of the specific route of this migration.

375 In the model the dynamics of labeled lymphocytes in the blood is described phenomenologically  
376 as a sum of several exponential functions, and by fitting a series of such models we found that the  
377 dynamics of labeled cells in the first 90 hours after cell transfer is best described by a sum of two  
378 exponentials (Table S1 and Figure 2B). The model predicted a rapid initial loss of lymphocytes in  
379 the blood at a rate of 2/h (half-life time of about 21 min) and a slower loss rate of 0.02/h after the  
380 first 4 hours (half-life time of 35 hours, Figure 2B and Table 2).

381 By fitting a series of mathematical models in which the number of sub-compartments in the pLN  
382 was varied, to the data on dynamics of labeled lymphocytes in the efferent lymph we found that  
383  $k = 3$  sub-compartments provided fits of the best quality (Table S1 and Figure 2D). Importantly,  
384 the model predicted the average residence time of lymphocytes in the pLN of 19.6 h which is nearly  
385 identical to the value found by fitting recirculation model to the same data (Table 2).

386 Both recirculation and blood-LN dynamics models were then fitted to the long-term migration  
387 data in which the dynamics of labeled cells in efferent lymph was measured continuously for 120 hours  
388 while in the blood there was an extra measurement at 120 hours (Figure 3A&B). The recirculation  
389 model with  $n = 3$  tissue compartments and  $k = 3$  sub-compartments was able to accurately describe  
390 the data although the model underestimated the number of labeled lymphocytes in the blood at 120  
391 hours post-transfer (Figure 3A and Table S2). Interestingly, the model required a non-zero rate of  
392 lymphocyte return from the third tissue back to circulation (Figure 3A and Table 2). The latter  
393 requirement stemmed from the fact that in the absence of lymphocyte return from the last tissue  
394 compartment the model would match worse the number of labeled cells in the blood (results not  
395 shown). Importantly, the recirculation model predicted similar average residence times of lympho-  
396 cytes in the first two compartments (representing spleen and LNs) to that of the model fitted to  
397 short-term dataset (Table 2).

398 Perhaps unsurprisingly, to describe the dynamics of labeled lymphocytes in the blood over 120  
399 hours the sum of three different exponential functions was required (Table S1). Furthermore, the  
400 model with  $k = 3$  sub-compartments in the pLN was able to describe the dynamics of labeled  
401 lymphocytes in efferent lymph with best quality (Table S1 and Figure 3B&D). The model predicted  
402 the average residence time of lymphocytes in LNs to be 19.6 h which is consistent with results from  
403 the recirculation model fitted to the same data or the models fitted to short-term migration data.

404 Taken together, analysis of data from Frost *et al.* [39] on recirculation of lymphocytes via prescapu-  
405 lar LN in sheep suggests non-exponentially distributed residence times of lymphocytes in the LNs  
406 with the average time being approximately 20 h. Developed mathematical models naturally ex-  
407 plain the long-term presence of labeled lymphocytes in efferent lymph node of a cannulated LN by  
408 continuous input of new labeled cells from the blood to the LN.

## 409 **3.2 Migration of lymphocytes from afferent to efferent lymph suggests** 410 **non-exponentially distributed residence time in LN**

411 Analysis on the dynamics of labeled lymphocytes transferred i.v. into sheep suggested that migration  
412 of lymphocytes via LN follows a multi-stage process which can be described as cell migration via  
413 identical sub-compartments (Figure 1B&C). Since the time it takes for lymphocytes to cross the  
414 endothelial barrier and enter LNs is very short (few minutes, [51]), the finding that distribution  
415 of lymphocyte residence times are not exponential could still be due to some unknown processes.



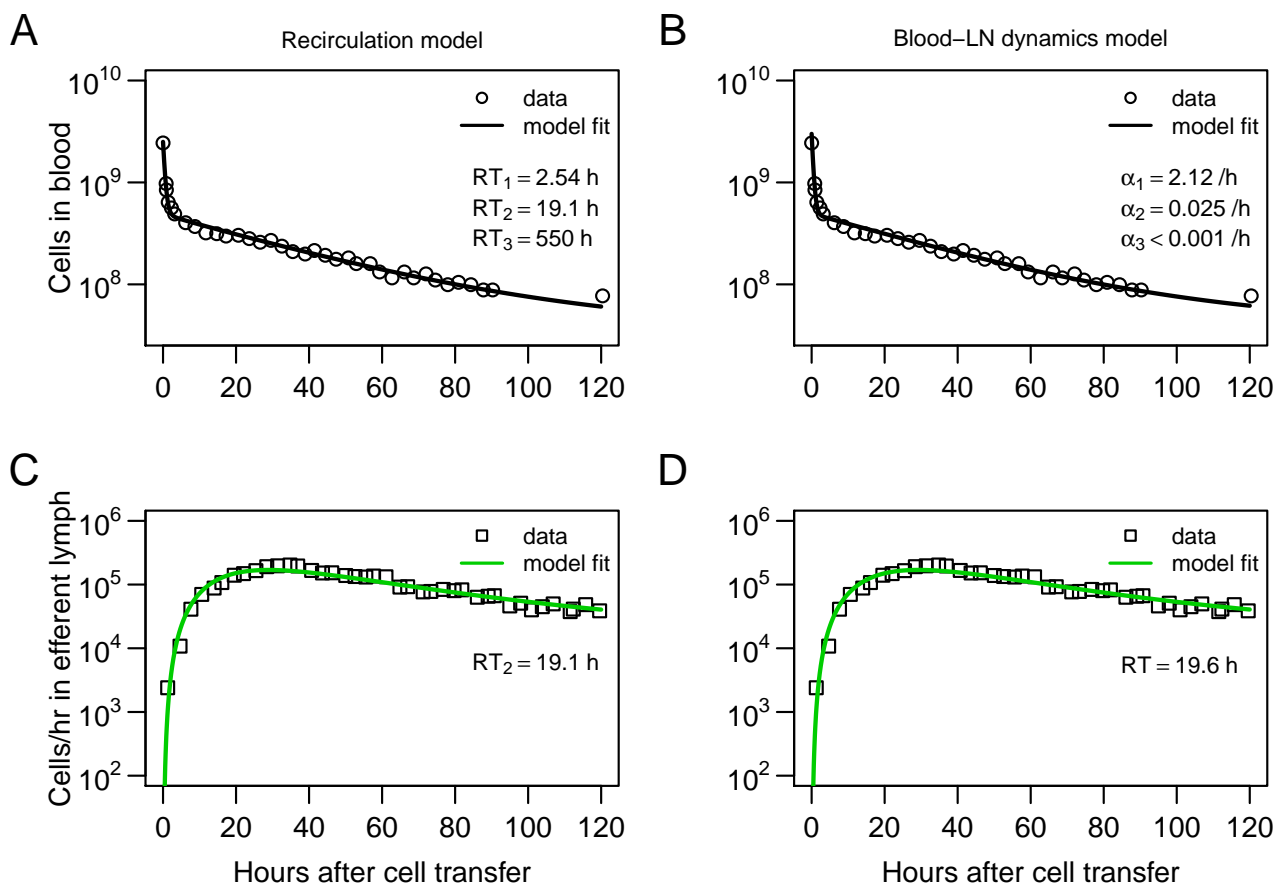

**Figure 3:** Explaining long-term recirculation kinetics of lymphocytes in sheep requires more complex mathematical models. We fitted either recirculation model (panels A&C, see eqns. (3)–(9)) or the blood-LN dynamics model (panels B&D, see eqns. (10)–(12)) to the data on the dynamics of labeled lymphocytes in the blood (panels A-B) and in efferent lymph of the pLN (panels C-D; see Materials and Methods for more detail) sampled for 5 days. In these experiments, there was only a single additional measurement of the labeled lymphocytes in the blood but continuous measurement of labeled lymphocytes in the efferent lymph (e.g., compare panel A to Figure 2A). The best fit of the recirculation model was found assuming lymphocyte recirculation via  $n = 3$  different compartments (and  $k = 3$  sub-compartments for the LNs) and average residency times in these compartments are indicated in panel A as  $RT_i$ . The best fit of the blood-LN dynamics model was with  $j = 3$  exponential decay functions and  $k = 3$  sub-compartments for the LNs. The best fit models were determined via a series of trials (see Tables S1 and S2). Parameter estimates and 95% CIs are shown in Table 2.

416 Therefore, to further investigate the issue of the distribution of residence times of lymphocytes in  
 417 ovine LNs we analyzed another experimental dataset. In these experiments, Young *et al.* [47] isolated  
 418 lymphocytes from the efferent lymph of the pLN, labeled and injected the cells into the afferent lymph  
 419 of the popliteal LN (poLN), and then measured exit of the labeled cells the efferent lymph of the  
 420 poLN (Figure 4 and see Materials and Methods for more detail). Cells, injected into the afferent  
 421 lymph, cannot move to any other tissue but the draining LN, and thus, such data allow to directly  
 422 evaluate kinetics of lymphocyte migration via individual LN.

423 To describe these experimental data, we adapted the blood-LN dynamics model to include migra-  
 424 tion of labeled lymphocytes from the afferent lymph to the LN and then to the efferent lymph (eqns.  
 425 (13)–(15)). The model has 3 unknown parameters that must be estimated from the data ( $A(0)$ ,  $m_A$ ,

| Model/Data                     | Residence Time ( $h$ )             |                       |
|--------------------------------|------------------------------------|-----------------------|
| Recirculation model/Short-term | $n = 3, k = 3$                     |                       |
| $m_{BS}, 1/h$                  | 1.01 [1.00, 1.01]                  |                       |
| $m_{SB}, 10^{-1}/h$            | 4.14 [4.12, 4.15]                  | 2.42 [2.40, 2.43]     |
| $m_{BL}, 10^{-1}/h$            | 2.81 [2.73, 2.89]                  |                       |
| $m_{LB}, 10^{-1}/h$            | 1.54 [1.51, 1.56]                  | 19.48 [19.23, 19.87]  |
| $m_{BT}, 10^{-2}/h$            | 9.92 [9.70, 10.14]                 |                       |
| $m_{TB}, 1/h$                  | 0                                  |                       |
| $\lambda, 10^{-3}$             | 1.96 [1.83, 2.09]                  |                       |
| Blood-LN model/Short-term      | $j = 2, k = 3$                     |                       |
| $X_1, 10^9$ cells              | 2.5                                |                       |
| $X_2, 10^8$ cells              | 4.50 [4.50, 4.50]                  |                       |
| $\alpha_1, 1/h$                | 1.98 [1.54, 2.42]                  |                       |
| $\alpha_2, 10^{-2}/h$          | 1.90 [1.79, 2.01]                  |                       |
| $m_{BL}, 10^{-2}/h$            | 3.53 [1.84, 5.22]                  |                       |
| $m_{LB}, 10^{-1}/h$            | 1.53 [1.42, 1.64]                  | 19.61 [18.29, 21.13]  |
| $\lambda, 10^{-2}$             | 1.5                                |                       |
| Recirculation model/Long-term  | $n = 3, k = 3$                     |                       |
| $m_{BS}, 1/h$                  | 1.38 [1.37, 1.38]                  |                       |
| $m_{SB}, 10^{-1}/h$            | 3.93 [3.91, 3.94]                  | 2.54 [2.54, 2.56]     |
| $m_{BL}, 10^{-2}/h$            | 2.81 [2.60, 3.04]                  |                       |
| $m_{LB}, 10^{-1}/h$            | 1.57 [1.46, 1.68]                  | 19.11 [17.86, 20.55]  |
| $m_{BT}, 10^{-1}/h$            | 1.12 [1.10, 1.13]                  |                       |
| $m_{TB}, 10^{-3}/h$            | 1.82 [0.89, 2.75]                  | 549.5 [363.6, 1123.6] |
| $\lambda, 10^{-2}$             | 1.88 [1.79, 1.97]                  |                       |
| Blood-LN model/Long-term       | $j = 3, k = 3$                     |                       |
| $X_1, 10^9$ cells              | 2.5                                |                       |
| $X_2, 10^8$ cells              | 4.548 [4.547, 4.548]               |                       |
| $X_3, 10^7$ cells              | 4.022 [4.021, 4.022]               |                       |
| $\alpha_1, 1/h$                | 2.12 [1.62, 2.61]                  |                       |
| $\alpha_2, 10^{-2}/h$          | 2.54 [2.27, 2.81]                  |                       |
| $\alpha_3, 10^{-15}/h$         | 2.10 [ $\pm 3.59 \times 10^{-3}$ ] |                       |
| $m_{BL}, 10^{-2}/h$            | 8.61 [7.01, 10.22]                 |                       |
| $m_{LB}, 10^{-1}/h$            | 1.53 [1.42, 1.64]                  | 19.61 [18.29, 21.13]  |
| $\lambda, 10^{-2}$             | 0.6                                |                       |

**Table 2:** Parameters of the best fit recirculation model (eqns. (3)–(9)) or the blood-LN dynamics model (eqns. (10)–(12)) fitted to either short-term migration data ( $t < 90$  h) or the long-term migration data of Frost *et al.* [39] (see Materials and Methods for more detail). In the recirculation model the three tissue compartments are suggested to be spleen, LNs, and other non-lymphoid tissues and the migration rates from the blood to these compartments are denoted as  $m_{ij}$  with  $i, j = B, S, L, T$ . In the blood-LN dynamics model it was not possible to estimate accurately the initial number of labeled lymphocytes in the blood ( $X_1$ ), so that parameter was fixed to  $X_1 = 2.5 \times 10^9$  cells. Residence times in LNs were calculated as  $RT = k/m_{LB}$  and as  $m_{iB}$  for other compartments ( $i = S, T$ ).

426  $m_{LB}$ ). Unfortunately, the original data for cell dynamics for individual animals were not available,  
427 and the digitize data only included 3 time points which did not allow accurate estimation of all model  
428 parameters (results not shown). Therefore, to investigate the dynamics of labeled cells in the efferent

429 lymph we fitted a series of mathematical models with a varying number of sub-compartments  $k$  in  
 430 the LN and average residence times  $RT = k/m_{LB}$  fixed to several different values to the experimental  
 431 data (Table S3). Analysis revealed that several sub-compartments are needed for accurate descrip-  
 432 tion of the data and the actual number of sub-compartments varied for different cell subtypes, but  
 433 was never less than  $k = 3$  (Table S3). The expected residence times also varied with the cell type  
 434 but overall were within 18-20 hour range which is consistent with the previous analysis of Frost *et al.*  
 435 [39] data (Figure 4).

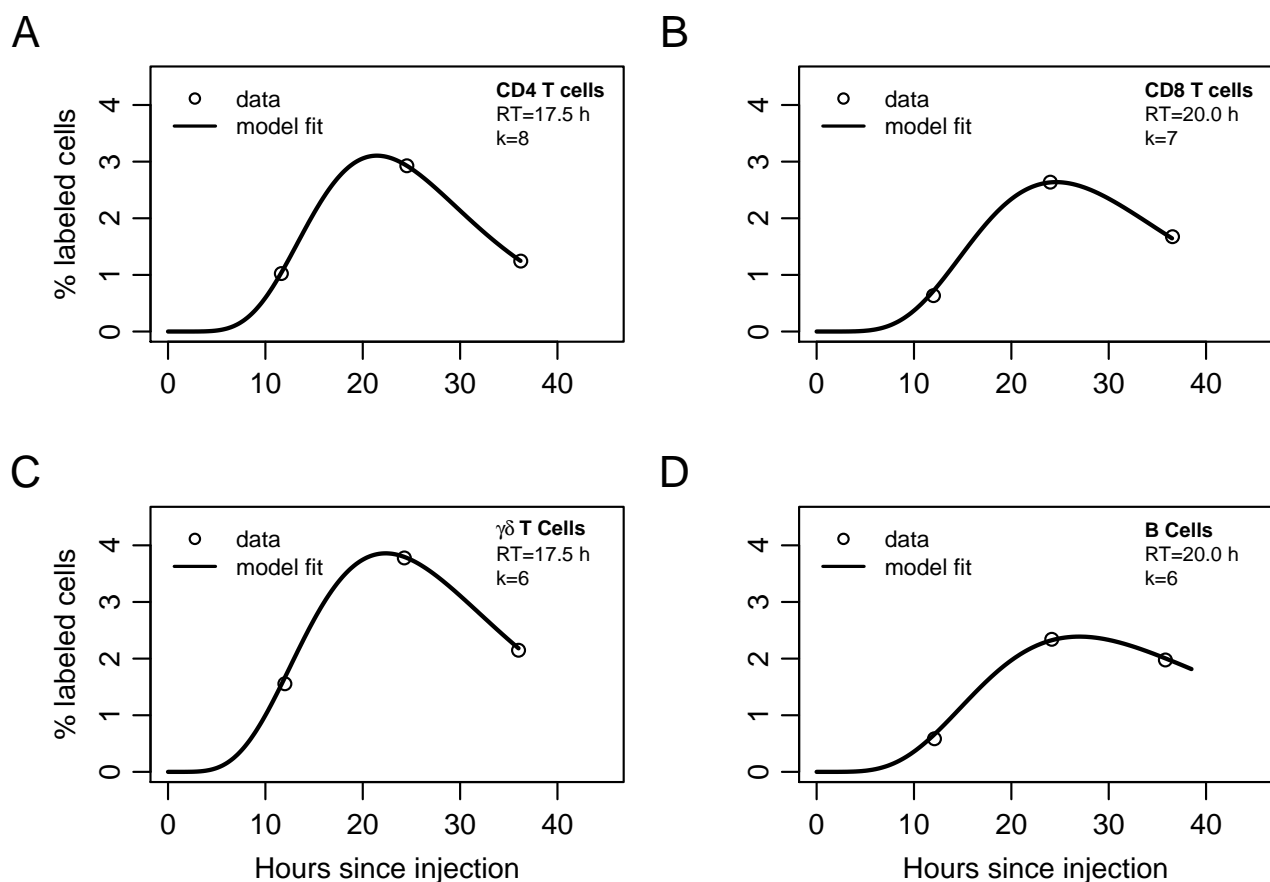

**Figure 4:** Mathematical modeling suggests non-exponentially distributed residency time of different subsets of lymphocytes in the LNs. CD4 T cells (panel A), CD8 T cells (panel B),  $\gamma\delta$  T cells (panel C) or B cells (panels D) were labeled and then injected into afferent lymph of popliteal LN (poLN) of sheep. The percent of labeled cells was followed in efferent lymph over time (see Materials and Methods for more detail and Young *et al.* [47]). We fitted a series of mathematical models assuming migration of injected lymphocytes into the LN with a variable number of sub-compartments  $k$  in the LNs (eqns. (13)–(15)). Due to scarcity of the data it was not possible to accurately estimate all parameters of the model (Table S4) and therefore the analysis was performed by assuming several fixed values for the residence time  $RT$  and by varying the number of sub-compartments in LNs (see Table S3). The best fits of the model leading to the lowest AIC values with the noted number of sub-compartments in the LN ( $k$ ) are shown by lines and parameters of the models are given in Table S4.

436 By fitting the data with the model in which the number of sub-compartments  $k$  was varied we  
 437 found that the estimated residence time of lymphocytes in the poLN was dependent on the assumed  
 438  $k$  (Table S4). This is consistent with our recent result on estimating residence time of T and B  
 439 lymphocytes in LNs of mice using the data from photoconvertible Kaede mice [9]. Interestingly,

440 the model fit predicted a relatively slow movement of lymphocytes from the afferent lymph to the  
 441 LN, which is determined by the parameter  $m_A$  ( $1/m_A \approx 5$  h) and was dependent on the number of  
 442 sub-compartments. These results also support our conclusion that residence times of lymphocytes in  
 443 ovine pLN are not exponentially distributed and the average residence time for different lymphocyte  
 444 subsets is around 20 hours.

### 445 3.3 Impact of lymphocyte kinetics in the blood on estimates of the lym- 446 phocyte residency time in the LNs

447 Our analysis of the Frost *et al.* [39] data demonstrated the usefulness of having measurements of  
 448 the dynamics of labeled lymphocytes both in the blood and efferent lymph of a specific cannulated  
 449 LN. Unfortunately, many of the published studies that we have surveyed lacked measurements of  
 450 lymphocyte counts in the blood and only recorded cell numbers in the efferent lymph, often as the  
 451 percent of labeled cells in the overall population. An important question is whether the estimates  
 452 of the residency time of lymphocytes in LNs, found by fitting mathematical models to the data on  
 453 lymphocyte counts in efferent lymph, depend on the assumed lymphocyte dynamics in the blood.

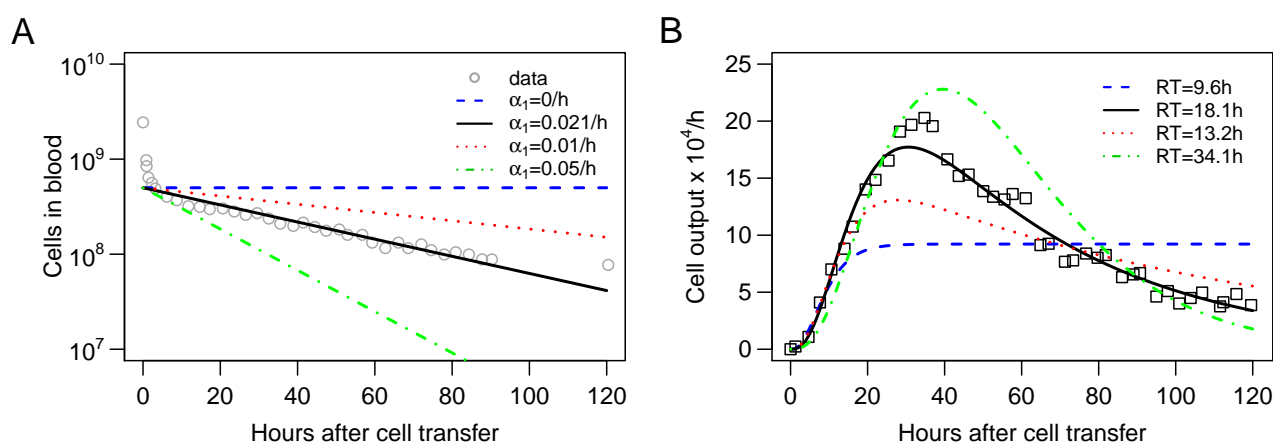

**Figure 5:** Kinetics of lymphocyte loss in the blood influences the estimate of the lymphocyte residence time in LNs. We fit the blood-LN dynamics model (eqns. (10)–(12)) to the data on accumulation and loss of labeled lymphocytes in the efferent lymph of the pLN of sheep (shown by markers in panel B; see Materials and Methods for details on the data) assuming that loss of the lymphocytes in the blood occurs exponentially at a rate  $\alpha_1$  (panel A). In contrast with other analyses, fits of the model to data in this case were done without  $\log_{10}$  transformation. In the fits the decline rate  $\alpha_1$  was either fixed to several different values ( $\alpha_1 = 0$ ,  $\alpha_1 = 0.01/h$ , or  $\alpha_1 = 0.05/h$ ) or was estimated by fitting the model to data in panel B ( $\alpha_1 = 0.021/h$ ). The estimated residence time of lymphocytes in the LN  $RT$  is indicated in panel B. In the fits we assumed that LNs have  $k = 3$  sub-compartments. The initial number of labeled lymphocytes in the blood  $X_1 = 5 \times 10^8$  and the proportion of lymphocytes migrating to the prescapular LN  $\lambda = 0.01$  were fixed in model fits of the data. In panel A the data on labeled lymphocyte dynamics in the blood from Frost *et al.* [39] was not used in model fitting and is only displayed by markers for illustrative purposes.

454 In several different experiments the decline of i.v. injected labeled lymphocytes in the blood is  
 455 bi-exponential with the rapid decline in cell numbers within a few hours and slower decline in the  
 456 next days [41, see Figure 2B]. By fitting the blood-LN dynamics model (with  $k = 3$ ) to the data on  
 457 the dynamics of labeled lymphocytes in efferent lymph (shown in Figure 2D) we found that fits of

458 similar quality could be obtained independently whether the dynamics of labeled cells in the blood  
459 follow either a single or bi-exponential decline (results not shown). However, the estimates of the  
460 average residence time of lymphocytes in LNs was dependent on the assumed model of lymphocyte  
461 dynamics in the blood; namely, assuming a bi-exponential decline resulted in longer average residence  
462 times (results not shown).

463 To investigate this issue further we fitted the blood-LN dynamics model (with  $k = 3$ ) assuming  
464 that the number of labeled cells in the blood follows an exponential decline, to the data on labeled  
465 cell dynamics in efferent lymph. In this analyses we either fitted the rate of cell decline in the blood  
466 ( $\alpha_1$ ) or fixed it to different values (Figure 5). We found that the decline rate of labeled cells in the  
467 blood has a dramatic impact on the quality of the model fit of the data as well as on estimates of  
468 the average residence times (Figure 5B). In particular, assuming that the number of labeled cells  
469 remains constant in the blood ( $\alpha_1 = 0$ ) predicts a constant output of labeled cells in efferent lymph,  
470 and as the result, failed to accurately describe the data (Figure 5B). Similarly, assuming that the  
471 loss of labeled cells occurs relatively rapidly ( $\alpha_1 = 0.05/h$ ) also results in poor fits of the data and  
472 longer average residence time of lymphocytes in the LN (Figure 5B). However, allowing the rate of  
473 lymphocyte loss  $\alpha_1$  to be fitted allowed the model describe the data well further suggesting that the  
474 long-term dynamics of labeled cells in the efferent lymph is the consequence of cell dynamics in the  
475 blood.

### 476 **3.4 Lymphocytes migrate more rapidly to LNs which the cells recently** 477 **exited**

478 All data analyzed so far have been for lymphocytes isolated from prescapular LNs which migrate  
479 back to prescapular or popliteal LNs. An important question is whether the average residence time  
480 of lymphocytes varies across types of LN. Indeed, previous analysis of migration of naive T cells in  
481 mice suggest that lymphocytes spend less time in gut-draining mesenteric LNs than in skin-draining  
482 LNs [42]. In contrast, another study suggested similar residency times of thoracic duct lymphocytes  
483 in skin- and gut-draining LNs of rats [43]. To address this issue we analyzed another experimental  
484 dataset.

485 In their studies, Reynolds *et al.* [20] isolated T lymphocytes from efferent lymph of prescapular  
486 or mesenteric LNs (pLN and mLN, respectively), labeled them with different fluorescent dyes, re-  
487 injected the cells into the same animal, and measured accumulation and loss of the labeled cells in  
488 efferent lymph of pLN and mLN (Figure 6 and see Materials and Methods for more detail). The data  
489 showed that T cells isolated from pLN accumulate to higher numbers in the efferent lymph of pLN  
490 as compared to cells from mLN and vice versa (Figure 7). There could be at least two alternative  
491 explanations for such differential accumulation of cells in LNs of their origin: preferential migration  
492 or preferential retention. According to the preferential migration hypothesis, cells from pLN have a  
493 higher rate of entry into pLN than the rate at which cells from mLN enter the pLN (and vice versa).  
494 In contrast, in the preferential retention hypothesis, cells from pLN have a longer residence time in  
495 pLN as compared to cells from mLN (and vice versa).

496 To discriminate between these alternative hypotheses, we fitted the blood-LN dynamics model  
497 to these data. Specifically, we assumed that the dynamics of labeled T cells in the blood follow  
498 bi-exponential decline and that lymphocytes must traverse via  $k = 3$  sub-compartments in the LNs.

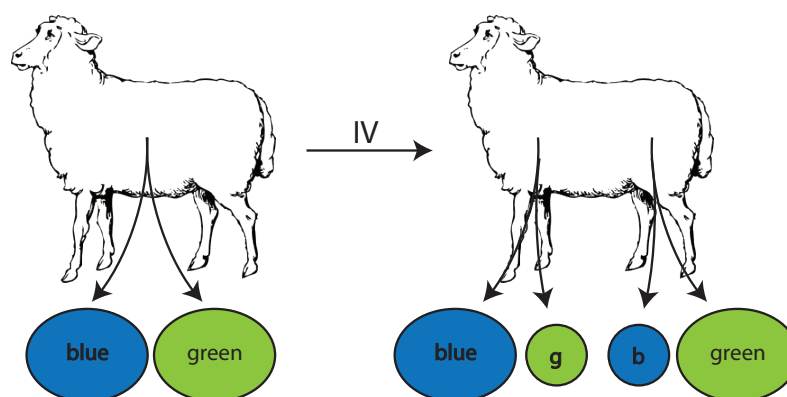

**Figure 6:** Experimental design of the study to evaluate migration of lymphocytes isolated from different LNs. Populations of lymphocytes were isolated from efferent lymph by cannulation of either the pLN (skin-draining) or the mesenteric (intestine-draining) lymph node (mLN), labeled with RITC (green) or FITC (blue), respectively. These cells were then injected i.v. into the same animal. Accumulation and loss of the injected lymphocytes was followed in efferent lymph of pLN and mLN over time.

499 In the preferential migration model we fixed the average residence times of lymphocytes in LNs for  
500 cells from pLN and mLN (determined by the parameter  $m_{LB}$ ) but allowed different rates of entry  
501 into the LN from the blood (determined by the parameter  $m_{BL}$ , see eqns. (16)–(20)). This model  
502 could accurately describe experimental data (Figure 7A&B). Interestingly, the model predicted 2 fold  
503 higher entry rate into pLN by cells of pLN origin and 3 fold higher entry rate into mLN by cells of  
504 mLN origin as compared to cells of pLN origin (Table S5). Importantly, assuming identical average  
505 residence time of T cells from pLN in skin-draining or gut-draining LNs resulted in fits of excellent  
506 quality suggesting the average residence time of T cells from pLN does not depend on the LN type.  
507 However, T cells from mLN migrated via LNs nearly 2 fold faster than T cells from pLN suggesting  
508 that the average residence time does depend on the origin of T cells.

509 In the alternative preferential retention model we fixed the rate of lymphocyte entry from the  
510 blood to the LNs and allowed the residence times (or more precisely, the rate of exit of T cells from  
511 the LNs) to vary depending on the LN type. This model failed to accurately describe the data (Figure  
512 7C&D) suggesting that the data cannot be explained solely by increased retention of cells in the LN  
513 of their origin. Importantly, allowing both entry and exit rates to depend on the LN type did not  
514 improve the model fit of the data for lymphocytes from pLN ( $F_{1,24} = 0.26$ ,  $p = 0.62$ ) but marginally  
515 improved the fit of the data for lymphocytes from mLN ( $F_{1,24} = 6.3$ ,  $p = 0.02$ ).

## 516 4 Discussion

517 It is well understood that some lymphocytes are able to recirculate between blood and secondary  
518 lymphoid tissues such as lymph nodes. In part, this understanding came from multiple experiments



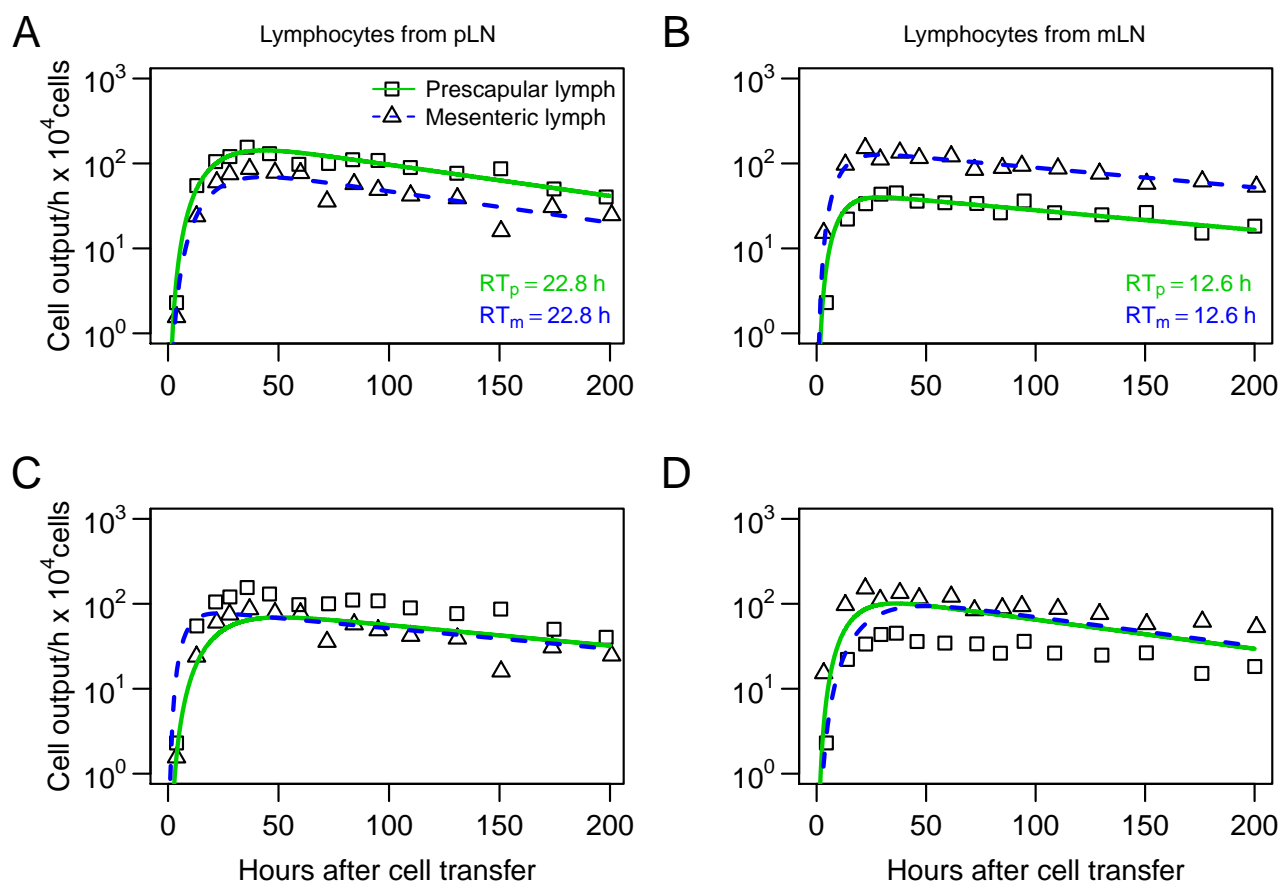

**Figure 7:** Lymphocytes have a higher entry rate into the LN which they recently exited. Experiments were performed as described in Figure 6 and the number of cells exiting pLN (boxes) or mLN (triangles) was recorded for lymphocytes collected previous from pLN (panels A&C) or from mLN (panels B&D). We fitted mathematical model (eqns. (16)–(20)) to the cannulation data either assuming that difference in lymphocyte dynamics is due to differential entry of lymphocytes into pLN and mLN (panels A&B) or is due to differential residence time of lymphocytes in the LNs (panels C&D). Markers show the data and lines are predictions of the mathematical models. Model parameters are shown in Table S5. The average residence times of lymphocytes in pLN ( $RT_p$ ) and mLN ( $RT_m$ ) predicted by the best fit model are shown on panels A&B.

519 on lymphocyte migration from the blood to efferent lymph of various LNs in sheep. Yet, while the  
 520 data on the kinetics of lymphocyte migration via individual LNs have been published, quantitative  
 521 interpretation of these data has been lacking until recently. In particular, the average residence time  
 522 of lymphocytes in the ovine LNs remained largely unknown and there was incomplete understanding  
 523 of why labeled lymphocytes persisted in the efferent lymph of cannulated LNs.

524 The first attempt known to us to explain lymphocyte dynamics in efferent lymph during can-  
 525 nulation experiments in sheep was by Thomas *et al.* [41] who modelled lymphocyte migration via  
 526 the LN as a random walk. The model suggested that long-term detection of labeled lymphocytes  
 527 in efferent lymph was due to inability of some lymphocytes to exit the LN. Here we formulated several  
 528 alternative mathematical models, based on the basic understanding of lymphocyte recirculation in  
 529 mammals which accurately explain the cannulation data, and proposed an alternative explanation  
 530 for long term detection of labeled cells in efferent lymph. Namely, because labeled cells persist in

531 the blood, continuous entry of such cells into the LN can naturally explain long-term persistence of  
532 labeled cells in the efferent lymph.

533 Our mathematical modeling approach allowed to provide novel estimates of lymphocyte residence  
534 time in ovine lymph nodes which vary between 12 and 20 hours depending on lymphocyte type  
535 and being approximately independent of the type of LN (e.g., skin- or gut-draining, Figures 2 and  
536 7). Furthermore, the combination of data and mathematical model predicted an existence of a  
537 compartment with a shorter residence time, about 2-3 hours, which we propose is likely to be the  
538 spleen. Indeed, we recently published a similar estimate of lymphocyte residence time in the spleen  
539 of rats [43]. Parameter estimates also suggest a relatively short residence time of lymphocytes in the  
540 blood (e.g., for long-term migration data  $1/(m_{BS} + m_{BL} + m_{BT}) \approx 1.6/\text{h}$  or  $RT_B = 28$  min). This is  
541 relatively similar to previous observations [9, 43].

542 Another important conclusion from our analyses is that the data on lymphocyte dynamics in  
543 efferent lymph is not described well by a model in which residence times of lymphocytes in LNs are  
544 exponentially distributed (Table 1). In part, this is because of the wide distribution in the exit rates  
545 of labeled lymphocytes in efferent lymph over time. However, describing cell migration via LNs as  
546 a simple one directional process and ignoring the ability of lymphocytes to remain in the LN for  
547 longer (e.g., by including a “backflow” in cell movement as was done by Thomas *et al.* [41]) may  
548 be an over-simplification. Yet, because the model in which lymphocyte residence times are gamma  
549 distributed describes the experimental data with acceptable quality (e.g., see Figure 2), introducing  
550 additional details/parameters contradicts the fundamental “Occam’s razor” principle.

551 Our analysis suggests potential limitations of interpreting data from ovine LN cannulation exper-  
552 iments in which the dynamics of transferred lymphocytes is not tracked in the blood. In particular,  
553 we found that estimates of lymphocyte residence times in LNs do depend on the assumed model for  
554 lymphocyte dynamics in the blood (e.g., single vs. double exponential decline and slow or rapid de-  
555 cline). Therefore, future studies on lymphocyte recirculation kinetics in sheep should always attempt  
556 to measure and report concentration of transferred cells in the blood.

557 One of the fundamental questions of lymphocyte recirculation is whether lymphocytes in the  
558 blood have some “memory” of the specific LN they recently came from, and if such memory ex-  
559 ists, whether it comes from preferential entry into a specific LN or from preferential retention in  
560 the LN. Several experimental studies have addressed the question qualitatively. For example, ac-  
561 tivated lymphocytes, or lymphoblasts, collected from the intestinal lymph of sheep were shown to  
562 accumulate preferentially in tissues associated with the gut [52], and a similar finding was reported  
563 for lymphoblasts isolated from intestinal lymph of rats [53, 54]. In contrast, lymphoblasts isolated  
564 from peripheral lymph preferentially accumulated in peripheral lymph nodes [53]. There has also  
565 been a distinction in migratory preference based on cellular subset as it has been observed that small  
566 lymphocytes accumulate in mucosal sites such as Peyer’s patches [55, 56].

567 We used mathematical modeling to investigate whether preferential accumulation of lymphocytes  
568 in the LN of their origin is due to preferential entry or preferential retention for one specific dataset  
569 [20]. Our analysis suggested that a model with preferential retention was not able to accurately  
570 describe the experimental data, while the model in which cells could preferentially enter a LN was  
571 able to describe the data well (Figure 7). Intuitively, this may be because the earliest increase in the  
572 number of cells found in the efferent lymph seems to be driven by rate of cell entry into the node  
573 and the data clearly indicate difference in cell accumulation in the efferent lymph depending on the  
574 cell’s origin.

575 There are a number of limitations with experimental data and our modeling analyses that need to  
576 be highlighted. In particular, in all of our experimental data, the dynamics of labeled lymphocytes  
577 in the efferent lymph was reported as a frequency of total cells, which required recalculation to  
578 determine the total number of cells exiting a specific LN per unit of time (e.g., [39]). Similarly,  
579 calculation of the total number of lymphocytes in the blood requires the knowledge of the total  
580 blood volume of animals which was not reported. The required recalculations may introduce errors  
581 (e.g., due to incorrectly assumed blood volume in the animals) and thus may influence the values for  
582 some estimated model parameters. For example, a smaller assumed blood volume in animals would  
583 naturally lead to a lower number of transferred lymphocytes in Frost *et al.* [39] experiments detected  
584 in the blood which should directly impact the estimate of the rate of lymphocyte migration from the  
585 blood to the LN. In fact, the absolute values of estimated rates at which lymphocytes are predicted  
586 to migrate to LNs from the blood should be treated as approximate.

587 One of the major assumptions we made in the models was that all labeled cells have identical  
588 migratory characteristics, e.g., all cells are capable of entering and exiting the LNs and do so at the  
589 same rates. In many previous studies the types of lymphocytes used in recirculation experiments  
590 (e.g., naive or memory lymphocytes, B or T cells) were not specified, and it is very possible that  
591 migratory properties vary by cell type (e.g., see [9]). It is clear however that including multiple cell  
592 subpopulations will increase complexity of the models, making them perhaps unidentifiable from the  
593 data we have available. Also, the models based on kinetically homogeneous cell populations could  
594 describe the data reasonably well, which suggests that there is no need to introduce a more complex  
595 models. Yet, comparison of predictions found by the best fit models for the data did indicate some  
596 discrepancy, for example, the best fit model was not fully capable of capturing the peak of the exit  
597 rate of labeled lymphocytes in efferent lymph (e.g., Figure 5B). It is possible that including slow  
598 and fast recirculating cell sub-populations may be able to fully capture the peak in labeled cells even  
599 though we were not able to improve fit of these data by extending the model to two sub-populations  
600 with different migration kinetics (results not shown).

601 Another major assumption of our modeling approach is that lymphocytes in circulation enter LNs  
602 via HEVs and not via afferent lymph of the tissues. While there is some experimental support for  
603 this assumption for lymphocytes migrating in non-inflammatory conditions [2], it is clear that during  
604 inflammation in the skin, many cells may enter the skin-draining LNs via afferent lymph [19].

605 At its core, the combination of experimental data and our models allowed us to estimate the time  
606 it takes for lymphocytes to migrate from the blood to the efferent lymph of specific LNs — and our  
607 results suggest that this time is gamma distributed. For lymphocytes migrating to LNs via HEVs,  
608 this distribution is likely to be related to lymphocyte residence time in LNs as lymphocytes pass via  
609 HEV rather quickly [51]. However, if lymphocytes migrate from the blood to efferent lymph by first  
610 entering non-lymphoid tissues (e.g., skin), then exiting the tissue into afferent lymphatics, and then  
611 pass via the LN — then our estimates of the average residence time of lymphocytes in LNs are upper  
612 bound values.

613 In most of our models we ignored the possibility of cell death. When describing labeled lymphocyte  
614 dynamics during short-term (< 90 h) migration experiments with the recirculation model (Figure 2)  
615 we found the need to have a tissue compartment which acts as a sink and thus may represent a death  
616 process (Table 2). However, there appears to be an equilibrium reached by recirculating lymphocytes  
617 in the blood by 120 h of the experiment (Figure 3A) suggesting a limited role of death process in  
618 determining overall dynamics of labeled lymphocytes. Still, we performed some additional analyses

619 by adding death rate to all tissue compartments and found that the best fit is found when such death  
620 rate is small or non-existent (Table S6).

621 Even with all limitations in the data and assumptions of the models, we provided a quantitative  
622 framework to analyze data from LN cannulation experiments in sheep. The models, developed in the  
623 paper, may need to be tailored to explain kinetics of lymphocyte recirculation in specific experiments.  
624 As illustrated in this work, greater insights into mechanisms regulating lymphocyte migration in  
625 large animals such as sheep and humans may thus be obtained by combining the use of quantitative  
626 experiments and mathematical modeling.

## 627 **Author's contributions**

628 The study was originally designed by VVG. Data were digitized from cited publications by MMD.  
629 All major analyses were performed by MMD. The paper was written by MMD and VVG.

## 630 **Acknowledgments**

631 We would like to thank the immunology community for discussion over this research, especially  
632 Michio Tomura, Gudrun Debes, and David Masopust. This work was in part supported by the NIH  
633 grant (R01 GM118553) to VVG.

## 634 **References**

- 635 1. Kindt, T. J., Osborne, B. & Goldsby, R. A. 2007 *Kuby Immunology, 6th edition*. New York: W.  
636 H. Freeman.
- 637 2. Mackay, C. R., Marston, W. L. & Dudler, L. 1990 Naive and memory T cells show distinct  
638 pathways of lymphocyte recirculation. *J Exp Med*, **171**(3), 801–817.
- 639 3. Westermann, J., Ehlers, E., Exton, M., Kaiser, M. & Bode, U. 2001 Migration of naive, effector  
640 and memory T cells: implications for the regulation of immune responses. *Immunol Rev*, **184**,  
641 20–37.
- 642 4. Duijvestijn, A. & Hamann, A. 1989 Mechanisms and regulation of lymphocyte migration. *Im-*  
643 *munol Today*, **10**(1), 23–28.
- 644 5. Ahmed, R & Biron, C. 1999 *Fundamental Immunology*, pp. 1295–1333. Philadelphia: Lippincott-  
645 Raven Publishers.
- 646 6. Marelli-Berg, F. M., Fu, H., Vianello, F., Tokoyoda, K. & Hamann, A. 2010 Memory T-cell  
647 trafficking: new directions for busy commuters. *Immunology*, **130**(2), 158–165.
- 648 7. Masopust, D., Choo, D., Vezys, V., Wherry, E. J., Duraiswamy, J., Akondy, R., Wang, J., Casey,  
649 K. A., Barber, D. L. *et al.* 2010 Dynamic T cell migration program provides resident memory  
650 within intestinal epithelium. *J Exp Med*, **207**(3), 553–564.

- 651 8. Gowans, J. L. & Knight, E. J. 1964 The route of re-circulation of lymphocytes in the rat. *Proc*  
652 *R Soc Lond B Biol Sci*, **159**, 257–282.
- 653 9. Ganusov, V. V. & Tomura, M. 2018 Experimental and mathematical approaches to quantify  
654 recirculation kinetics of lymphocytes. *bioRxiv*. doi:10.1101/268326.
- 655 10. Jenkins, M. K. & Moon, J. J. 2012 The role of naive T cell precursor frequency and re-  
656 cruitment in dictating immune response magnitude. *J Immunol*, **188**(9), 4135–4140. doi:  
657 10.4049/jimmunol.1102661.
- 658 11. Textor, J., Henrickson, S. E., Mandl, J. N., von Andrian, U. H., Westermann, J., de Boer, R. J.  
659 & Beltman, J. B. 2014 Random migration and signal integration promote rapid and robust T  
660 cell recruitment. *PLoS Comput Biol*, **10**(8), e1003752. doi:10.1371/journal.pcbi.1003752.
- 661 12. Grebenciucova, E., Reder, A. T. & Bernard, J. T. 2016 Immunologic mechanisms of fingolimod  
662 and the role of immunosenescence in the risk of cryptococcal infection: A case report and review of  
663 literature. *Multiple sclerosis and related disorders*, **9**, 158–162. doi:10.1016/j.msard.2016.07.015.
- 664 13. Winkelmann, A., Loebermann, M., Reisinger, E. C., Hartung, H.-P. & Zettl, U. K. 2016 Disease-  
665 modifying therapies and infectious risks in multiple sclerosis. *Nature reviews. Neurology*, **12**,  
666 217–233. doi:10.1038/nrneurol.2016.21.
- 667 14. Chiba, K., Yanagawa, Y., Masubuchi, Y., Kataoka, H., Kawaguchi, T., Ohtsuki, M. & Hoshino,  
668 Y. 1998 FTY720, a novel immunosuppressant, induces sequestration of circulating mature lym-  
669 phocytes by acceleration of lymphocyte homing in rats. I. FTY720 selectively decreases the  
670 number of circulating mature lymphocytes by acceleration of lymphocyte homing. *J Immunol*,  
671 **160**(10), 5037–5044.
- 672 15. Honig, S. M., Fu, S., Mao, X., Yopp, A., Gunn, M. D., Randolph, G. J. & Bromberg, J. S. 2003  
673 FTY720 stimulates multidrug transporter- and cysteinyl leukotriene-dependent T cell chemotaxis  
674 to lymph nodes. *J Clin Invest*, **111**(5), 627–637. doi:10.1172/JCI16200.
- 675 16. Cyster, J. G. & Schwab, S. R. 2012 Sphingosine-1-phosphate and lymphocyte egress from lym-  
676 phoid organs. *Annu Rev Immunol*, **30**, 69–94. doi:10.1146/annurev-immunol-020711-075011.
- 677 17. Gowans, J. L. 1957 The effect of the continuous re-infusion of lymph and lymphocytes on the  
678 output of lymphocytes from the thoracic duct of unanaesthetized rats. *Br J Exp Pathol*, **38**(1),  
679 67–78.
- 680 18. Hall, J. G. & Morris, B. 1965 The origin of the cells in the efferent lymph from a single lymph  
681 node. *J Exp Med*, **121**, 901–910.
- 682 19. Issekutz, T. B., Chin, G. W. & Hay, J. B. 1981 Lymphocyte traffic through chronic inflammatory  
683 lesions: differential migration versus differential retention. *Clin Exp Immunol*, **45**, 604–614.
- 684 20. Reynolds, J., Heron, I., Dudler, L. & Trnka, Z. 1982 T-cell recirculation in the sheep: migratory  
685 properties of cells from lymph nodes. *Immunology*, **47**(3), 415.
- 686 21. Smith, M. & Ford, W. 1983 The recirculating lymphocyte pool of the rat: a systematic description  
687 of the migratory behaviour of recirculating lymphocytes. *Immunology*, **49**(1), 83–94.



- 688 22. Mackay, C. R., Marston, W. L., Dudler, L., Spertini, O., Tedder, T. F. & Hein, W. R. 1992  
689 Tissue-specific migration pathways by phenotypically distinct subpopulations of memory T cells.  
690 *Eur J Immunol*, **22**(4), 887–895.
- 691 23. Williams, M. B. & Butcher, E. C. 1997 Homing of naive and memory T lymphocyte subsets to  
692 peyer’s patches, lymph nodes, and spleen. *J Immunol*, **159**(4), 1746–1752.
- 693 24. Young, A. J. 1999 The physiology of lymphocyte migration through the single lymph node in  
694 vivo. In *Sem Immunol*, vol. 11, pp. 73–83. Elsevier.
- 695 25. Ebert, L. M., Schaerli, P. & Moser, B. 2005 Chemokine-mediated control of T cell  
696 traffic in lymphoid and peripheral tissues. *Molecular immunology*, **42**, 799–809. doi:  
697 10.1016/j.molimm.2004.06.040.
- 698 26. Schaerli, P. & Moser, B. 2005 Chemokines: control of primary and memory T-cell traffic. *Im-*  
699 *munologic research*, **31**, 57–74. doi:10.1385/IR:31:1:57.
- 700 27. Cyster, J. G. 2005 Chemokines, sphingosine-1-phosphate, and cell migration in secondary lym-  
701 phoid organs. *Ann Rev Immunol*, **23**, 127–159. doi:10.1146/annurev.immunol.23.021704.115628.
- 702 28. Brinkman, C. C., Peske, J. D. & Engelhard, V. H. 2013 Peripheral tissue homing receptor control  
703 of nave, effector, and memory CD8 T cell localization in lymphoid and non-lymphoid tissues.  
704 *Front Immunol*, **4**, 241. doi:10.3389/fimmu.2013.00241.
- 705 29. Trepel, F. 1974 Number and distribution of lymphocytes in man. A critical analysis. *Klin.*  
706 *Wschr.*, **52**, 511–515.
- 707 30. Ganusov, V. V. & De Boer, R. J. 2007 Do most lymphocytes in humans really reside in the gut?  
708 *Trends Immunol*, **28**(12), 514–8.
- 709 31. Mackay, C. R., Kimpton, W. G., Brandon, M. R. & Cahill, R. 1988 Lymphocyte subsets show  
710 marked differences in their distribution between blood and the afferent and efferent lymph of  
711 peripheral lymph nodes. *J Exp Med*, **167**(6), 1755–1765.
- 712 32. Forster, R., Braun, A. & Worbs, T. 2012 Lymph node homing of T cells and dendritic cells via  
713 afferent lymphatics. *Trends Immunol*, **33**(6), 271–280. doi:10.1016/j.it.2012.02.007.
- 714 33. Hall, J. 1967 A method for collecting lymph from the prefemoral lymph node of unanaesthetised  
715 sheep. *Experimental Physiology*, **52**(2), 200–204.
- 716 34. Miyasaka, M. & Trnka, Z. 1986 Lymphocyte migration and differentiation in a large-animal  
717 model: The sheep. *Immunological reviews*, **91**(1), 87–114.
- 718 35. Lefkovits, I. 1997 *Immunology Methods Manual: The Comprehensive Sourcebook of Techniques*,  
719 vol. volume 4 of *Immunology Methods Manual: The Comprehensive Sourcebook of Techniques*.  
720 Academic Press.
- 721 36. Bimczok, D. & Rothkotter, H. 2006 Lymphocyte migration studies. *Vet Res*, **37**(3), 325–338.
- 722 37. Van Rhijn, I., Rutten, V. P. M. G., Charleston, B., Smits, M., van Eden, W. & Koets, A. P.  
723 2007 Massive, sustained gamma-delta T cell migration from the bovine skin in vivo. *J Leukoc*  
724 *Biol*, **81**, 968–973. doi:10.1189/jlb.0506331.



- 725 38. Vrieling, M., Santema, W., Van Rhijn, I., Rutten, V. & Koets, A. 2012 Gamma-delta t cell  
726 homing to skin and migration to skin-draining lymph nodes is CCR7 independent. *J Immunol*,  
727 **188**, 578–584. doi:10.4049/jimmunol.1101972.
- 728 39. Frost, H., Cahill, R. & Trnka, Z. 1975 The migration of recirculating autologous and allogeneic  
729 lymphocytes through single lymph nodes. *Eur J Immunol*, **5**(12), 839–843.
- 730 40. Cahill, R. N., Frost, H. & Trnka, Z. 1976 The effects of antigen on the migration of recirculating  
731 lymphocytes through single lymph nodes. *J Exp Med*, **143**(4), 870–888.
- 732 41. Thomas, N., Marejovicova, L., Srikusalanukul, W., Shawe-Taylor, J. & Chain, B. 2012 Directional  
733 migration of recirculating lymphocytes through random walks. *PLoS One*.
- 734 42. Mandl, J. N., Liou, R., Klauschen, F., Vriskoop, N., Monteiro, J. P., Yates, A. J., Huang, A. Y.  
735 & Germain, R. N. 2012 Quantification of lymph node transit times reveals differences in antigen  
736 surveillance strategies of naive CD4+ and CD8+ T cells. *PNAS*, **109**(44), 18 036–18 041.
- 737 43. Ganusov, V. V. & Auerbach, J. 2014 Mathematical modeling reveals kinetics of lymphocyte  
738 recirculation in the whole organism. *PLoS Comp Biol*, **10**, e1003 586.
- 739 44. Brenner, M. K. & Heslop, H. E. 2010 Adoptive T cell therapy of cancer. *Current Opinion in*  
740 *Immunology*, **22**, 251–257. doi:10.1016/j.coi.2010.01.020.
- 741 45. Rosenberg, S. A. & Restifo, N. P. 2015 Adoptive cell transfer as personalized immunotherapy for  
742 human cancer. *Science*, **348**, 62–68. doi:10.1126/science.aaa4967.
- 743 46. Ikeda, H. 2016 T-cell adoptive immunotherapy using tumor-infiltrating T cells and genetically  
744 engineered TCR-T cells. *International immunology*, **28**, 349–353. doi:10.1093/intimm/dxw022.
- 745 47. Young, A. J., Marston, W. L. & Dudler, L. 2000 Subset-specific regulation of the lymphatic exit  
746 of recirculating lymphocytes in vivo. *J Immunol*, **165**, 3168–3174.
- 747 48. Hansard, S. L., Butler, W. O., Comar, C. & Hobbs, C. 1953 Blood volume of farm animals.  
748 *Journal of Animal Science*, **12**(2), 402–413.
- 749 49. Murphy, K. P. 2012 *Janeway's Immunobiology 8th edition*. Garland Publishing, 8th edn.
- 750 50. Burnham, K. P. & Anderson, D. R. 2002 *Model selection and multimodel inference: a practical*  
751 *information-theoretic approach*. Springer-Verlag, New York.
- 752 51. Harp, J. A., Pesch, B. A. & Runnels, P. L. 1990 Extravasation of lymphocytes via paracortical  
753 venules in sheep lymph nodes: visualization using an intracellular fluorescent label. *Veterinary*  
754 *immunology and immunopathology*, **24**, 159–167.
- 755 52. Chin, W. & Hay, J. 1980 A comparison of lymphocyte migration through intestinal lymph nodes,  
756 subcutaneous lymph nodes, and chronic inflammatory sites of sheep. *Gastroenterology*, **79**(6),  
757 1231.
- 758 53. Griscelli, C., Vassalli, P. & McCluskey, R. T. 1969 The distribution of large dividing lymph node  
759 cells in syngeneic recipient rats after intravenous injection. *J Exp Med*, **130**(6), 1427–1451.

- 760 54. Rose, M., Parrott, D. & Bruce, R. 1976 Migration of lymphoblasts to the small intestine. I.  
761 Effect of trichinella spiralis infection on the migration of mesenteric lymphoblasts and mesenteric  
762 T lymphoblasts in syngeneic mice. *Subject Strain Bibliography*.
- 763 55. Picker, L. J., Terstappen, L., Rott, L., Streeter, P., Stein, H. & Butcher, E. 1990 Differential ex-  
764 pression of homing-associated adhesion molecules by T-cell subsets in man. *J Immunol*, **145**(10),  
765 3247–3255.
- 766 56. Hamann, A., Andrew, D. P., Jablonski-Westrich, D., Holzmann, B. & Butcher, E. C. 1994 Role  
767 of alpha 4-integrins in lymphocyte homing to mucosal tissues in vivo. *J Immunol*, **152**(7), 3282–  
768 3293.
